# Supplementary material for: Superparamagnetic nanoparticles as a recyclable catalyst: a new access to phenol esters via cross dehydrogenative coupling reactions
Source: Royal Society of Chemistry journal article supplement (doi:10.1039/c7ra11706j), 2017-01-01
Supplement: c7ra11706j1.pdf [file c7ra11706j1.pdf]

**Superparamagnetic nanoparticles as a recyclable catalyst: A new access to phenol esters  
via cross dehydrogenative coupling reactions**

Chung K. Nguyen, Hoang H. Vu, Ha V. Dang, Ngon N. Nguyen, Nhan T. H. Le, Nam T. S.

Phan\*

Faculty of Chemical Engineering, HCMC University of Technology, VNU-HCM,

268 Ly Thuong Kiet, District 10, Ho Chi Minh City, Viet Nam

\*Email: [ptsnam@hcmut.edu.vn](mailto:ptsnam@hcmut.edu.vn)

Ph: (+84 8) 38647256 ext. 5681

Fx: (+84 8) 38637504

**Supporting Information**

*Materials and instrumentation*

All reagents and starting materials were obtained commercially from Sigma-Aldrich and Merck, and were used as received without any further purification unless otherwise noted. Nitrogen physisorption measurements were conducted using a Micromeritics 2020 volumetric adsorption analyzer system. Samples were pretreated by heating under vacuum at 150 °C for 3 h. X-ray powder diffraction (XRD) patterns were recorded using a Cu K $\alpha$  radiation source on a D8 Advance Bruker powder diffractometer. Elemental analysis with atomic absorption spectrometry (AAS) was performed on an AA-6800 Shimadzu. Magnetic properties were measured with a EV11 vibrating sample magnetometer (VSM) at room temperature. Scanning electron

microscopy studies were conducted on a JSM 7401F Scanning Electron Microscope (SEM). Transmission electron microscopy studies were performed using a JEOL JEM 1400 Transmission Electron Microscope (TEM) at 100 kV.

Gas chromatographic (GC) analyses were performed using a Shimadzu GC 2010-Plus equipped with a flame ionization detector (FID) and an SPB-5 column (length = 30 m, inner diameter = 0.25 mm, and film thickness = 0.25  $\mu\text{m}$ ). The temperature program for GC analysis held samples at 100  $^{\circ}\text{C}$  for 1 min; heated them from 100 to 280  $^{\circ}\text{C}$  at 40  $^{\circ}\text{C}/\text{min}$ ; held them at 280  $^{\circ}\text{C}$  for 5.5 min. Inlet and detector temperatures were set constant at 280  $^{\circ}\text{C}$ . Diphenyl ether was used as an internal standard to calculate GC yield. GC-MS analyses were performed using a Shimadzu GCMS-QP2010Ultra with a ZB-5MS column (length = 30 m, inner diameter = 0.25 mm, and film thickness = 0.25  $\mu\text{m}$ ). The temperature program for GC-MS analysis held samples at 50  $^{\circ}\text{C}$  for 2 min; heated samples from 50 to 280 $^{\circ}\text{C}$  at 10  $^{\circ}\text{C}/\text{min}$  and held them at 280  $^{\circ}\text{C}$  for 10 min. Inlet temperature was set constant at 280  $^{\circ}\text{C}$ . MS spectra were compared with the spectra gathered in the NIST library. The  $^1\text{H}$  NMR and  $^{13}\text{C}$  NMR were recorded on Bruker AV 500 spectrometers using residual solvent peak as a reference.

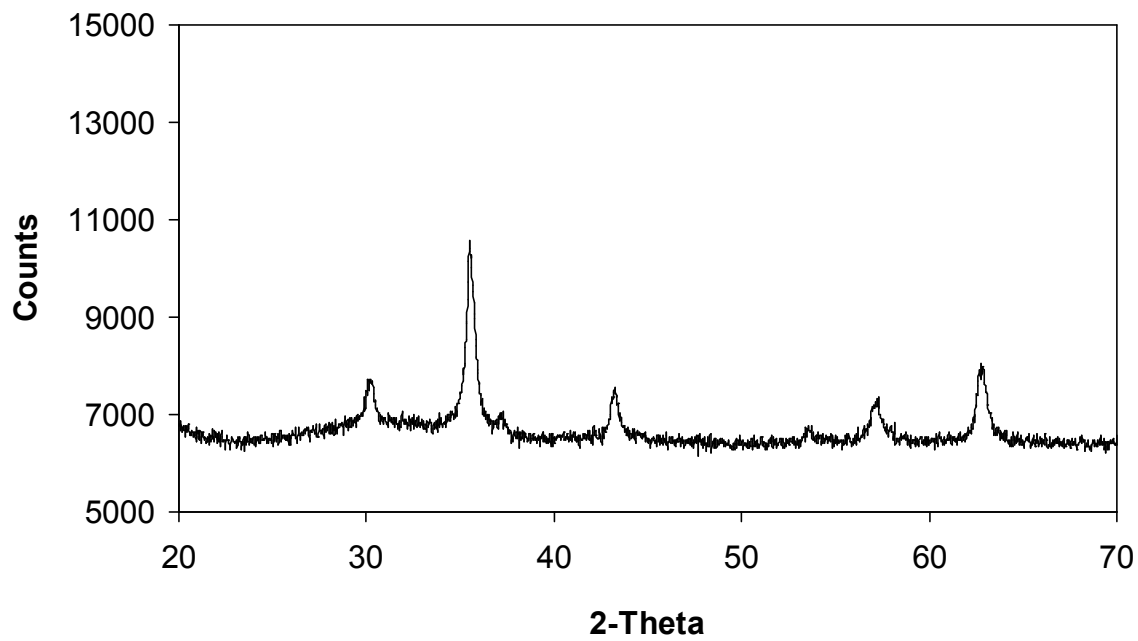

Fig. S1. X-ray powder diffractograms of the  $\text{CuFe}_2\text{O}_4$  catalyst.

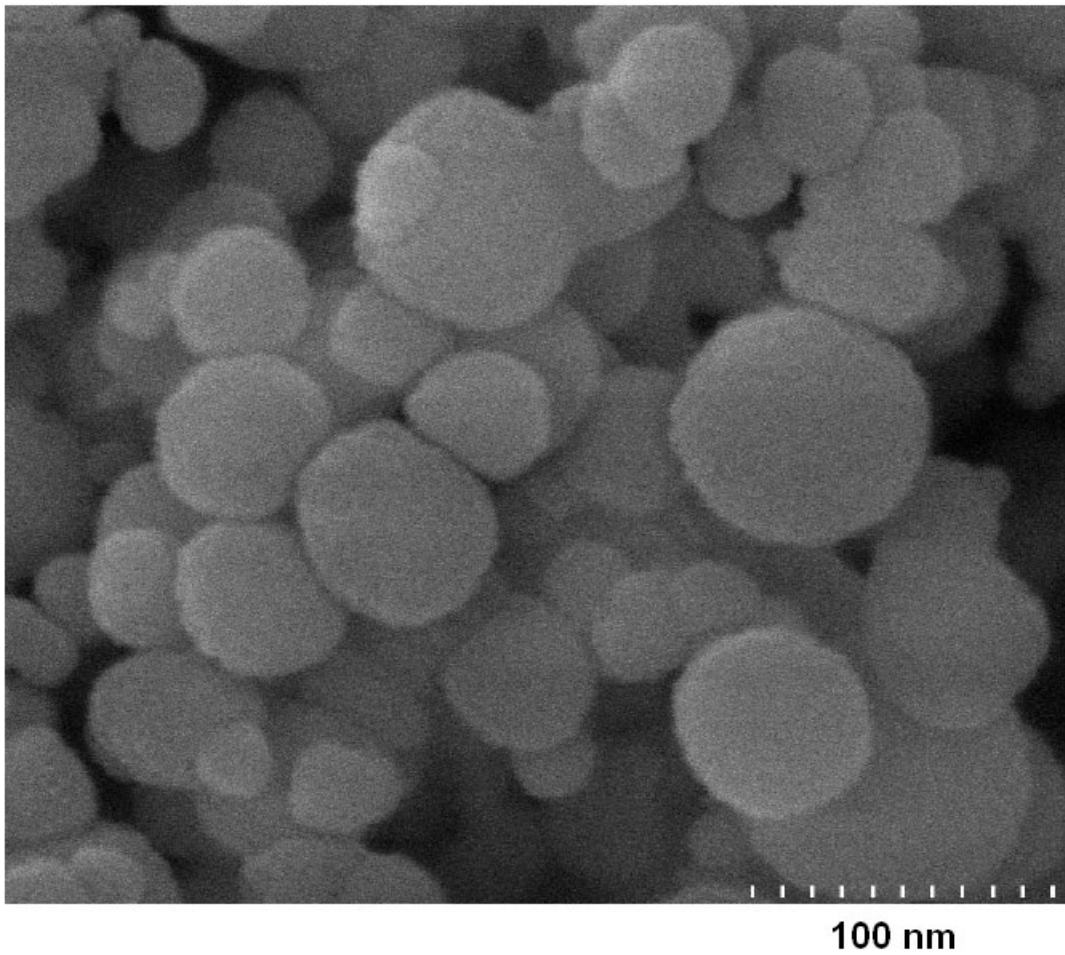

Fig. S2. SEM micrograph of the CuFe<sub>2</sub>O<sub>4</sub> catalyst.

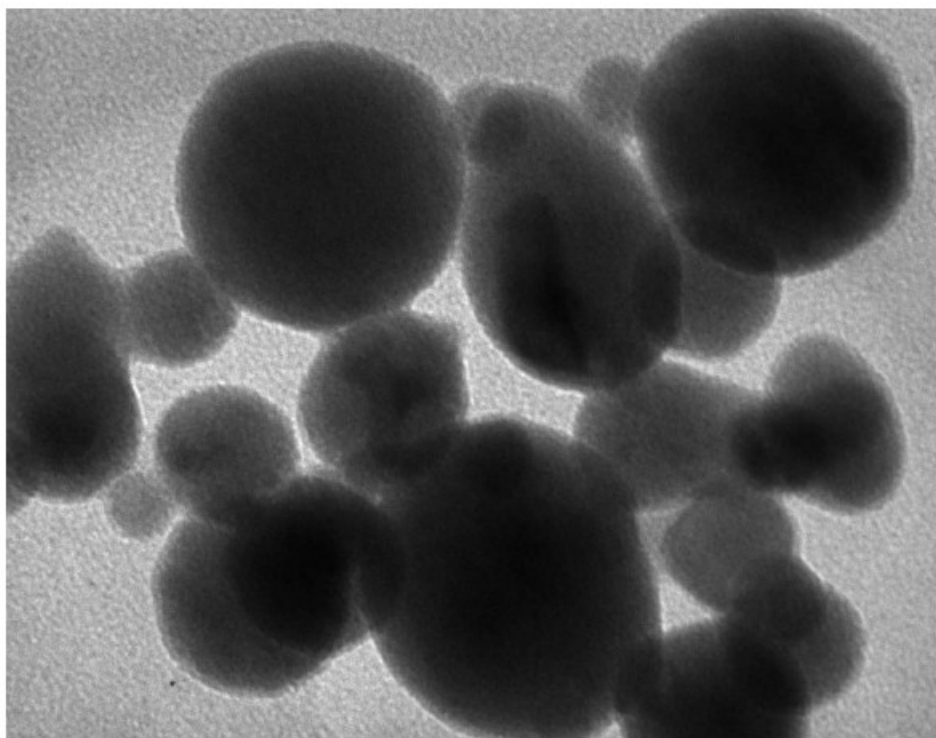

20 nm

Fig. S3. TEM micrograph of the  $\text{CuFe}_2\text{O}_4$  catalyst.

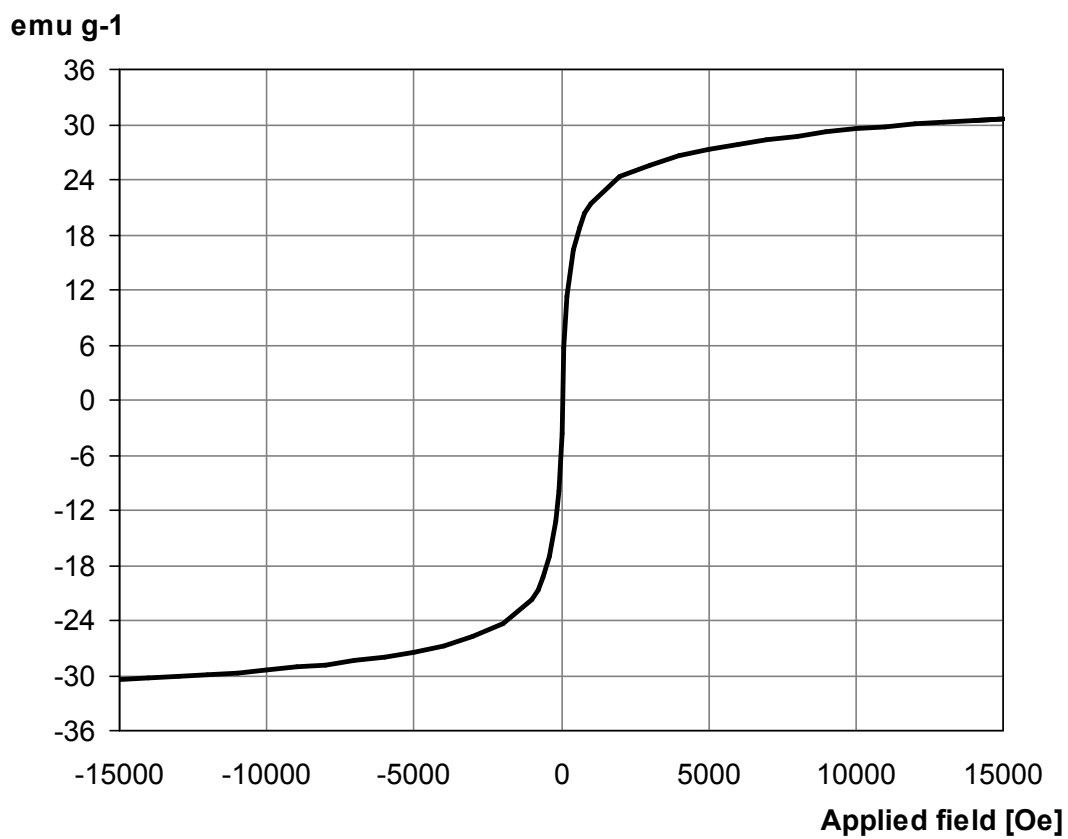

Fig. S4. Magnetization curves for the  $\text{CuFe}_2\text{O}_4$  catalyst measured at room temperature.

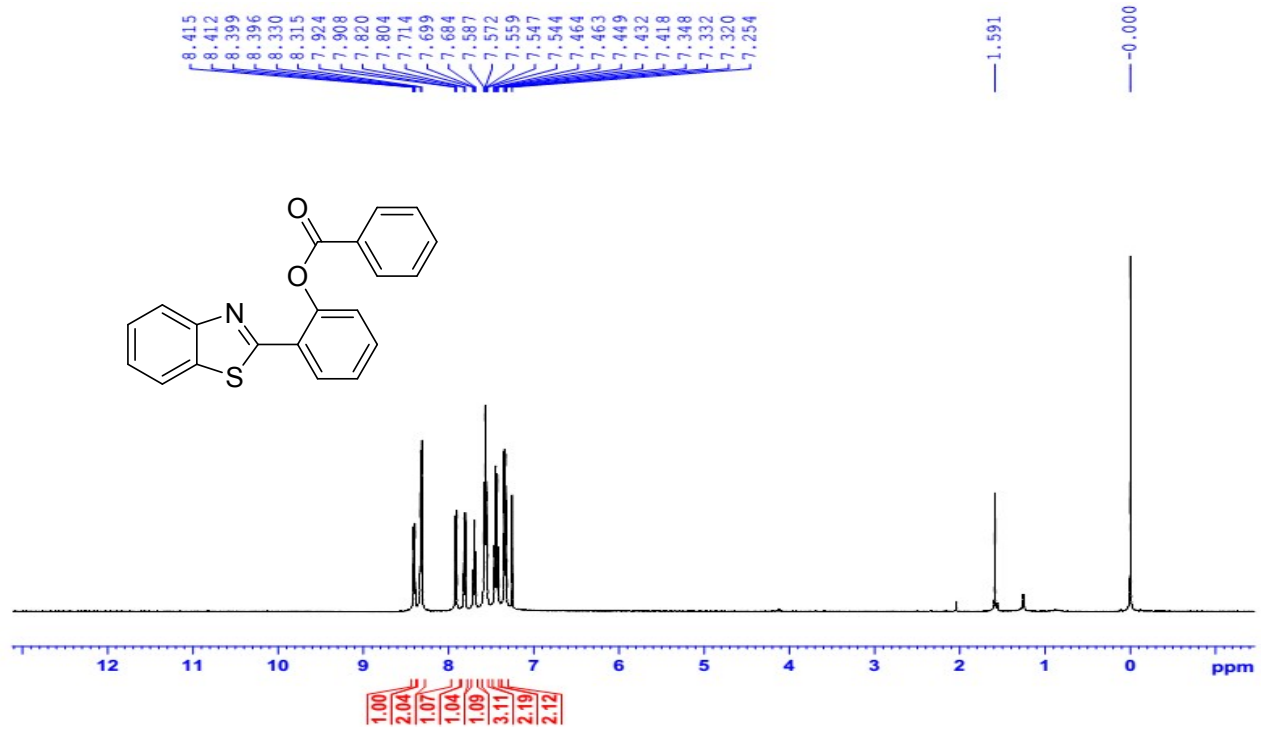

Fig. S5. <sup>1</sup>H-NMR spectra of 2-(benzo[d]thiazol-2-yl)phenyl benzoate.

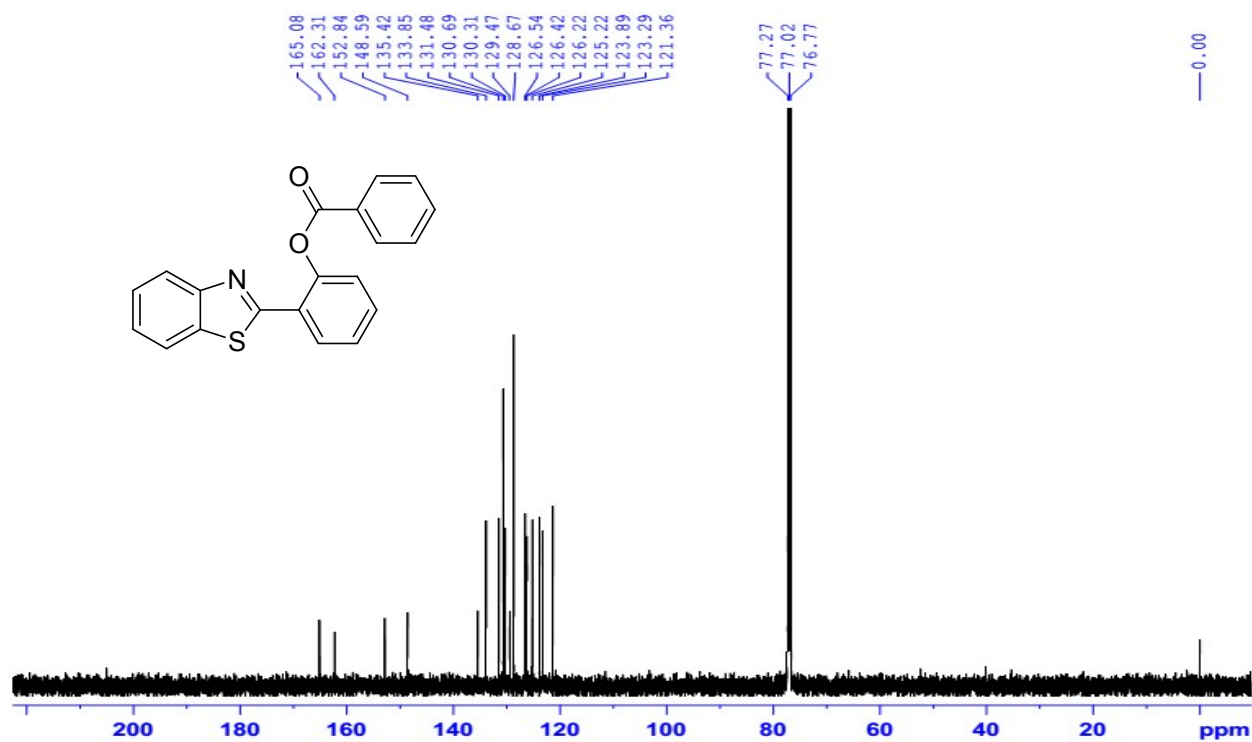

Fig. S6.  $^{13}\text{C}$ -NMR of 2-(benzo[d]thiazol-2-yl)phenyl benzoate.

### Characterization Data for 2-(benzo[d]thiazol-2-yl)phenyl benzoate.

Prepared as shown in the general experimental procedure and purified on silica gel (hexane/ethyl acetate = 10:1): yellow solid, 83% yield.  $^1\text{H}$ -NMR (500 MHz,  $\text{CDCl}_3$ -*d*)  $\delta$  8.40 (dd,  $J = 7.9$  Hz,  $J = 1.5$  Hz, 1H, ArH), 8.32 (d,  $J = 8.0$  Hz, 2H, ArH), 7.91 (d,  $J = 8.0$  Hz, 1H, ArH), 7.81 (d,  $J = 8.0$  Hz, 1H, ArH), 7.68 – 7.71 (m, 1H, ArH), 7.54 – 7.59 (m, 3H, ArH), 7.42 – 7.46 (m, 2H, ArH), 7.32 – 7.35 (m, 2H, ArH);  $^{13}\text{C}$ -NMR (125 MHz,  $\text{CDCl}_3$ -*d*)  $\delta$  165.1, 162.3, 152.8, 148.6, 135.4, 133.8, 131.5, 130.7, 130.3, 129.5, 128.7, 126.5, 126.4, 126.2, 125.2, 123.9, 123.3, 121.4.



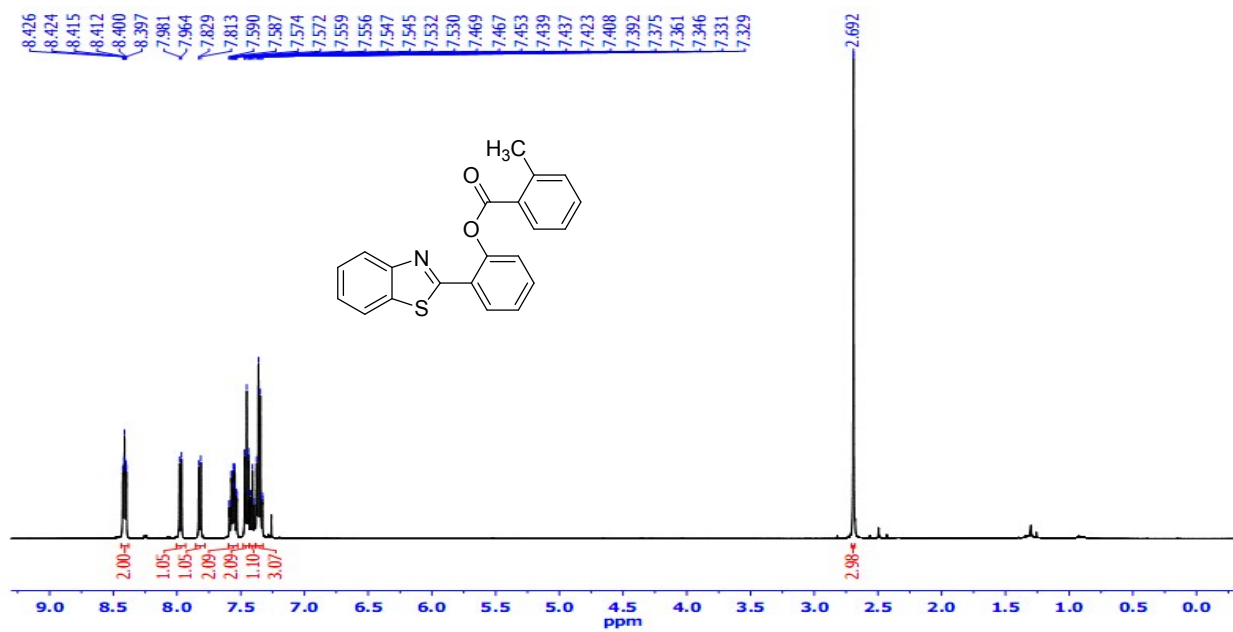

Fig. S7. <sup>1</sup>H-NMR spectra of 2-(benzo[d]thiazol-2-yl)phenyl 2-methylbenzoate.

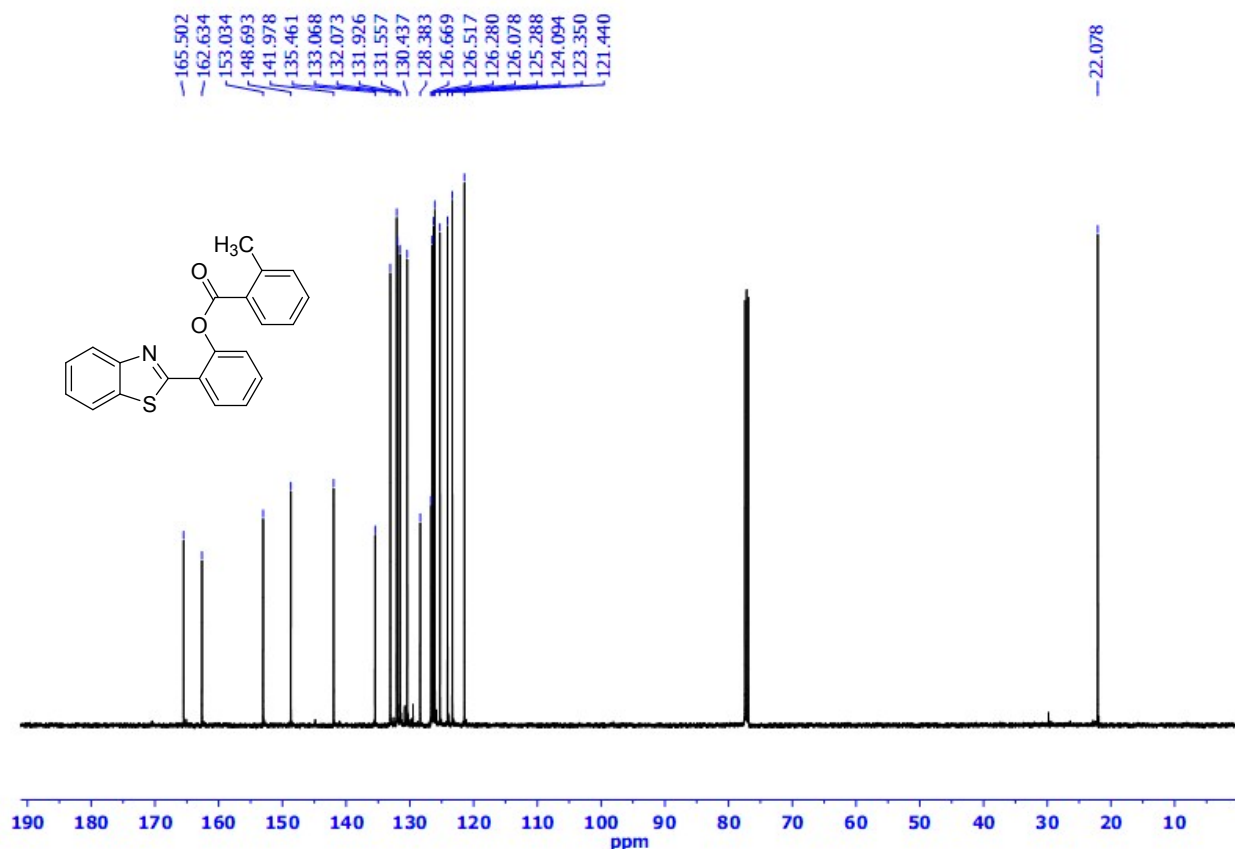

Fig. S8. <sup>13</sup>C-NMR spectra of 2-(benzo[d]thiazol-2-yl)phenyl 2-methylbenzoate.

### Characterization Data for 2-(benzo[d]thiazol-2-yl)phenyl 2-methylbenzoate.

Prepared as shown in the general experimental procedure and purified on silica gel (hexane/ethyl acetate = 10:1): yellow gummy, 82% yield. <sup>1</sup>H-NMR (500 MHz, CDCl<sub>3</sub>-d) δ 8.38 – 8.42 (m, 2H, ArH), 7.97 (d, *J* = 8.2 Hz, 1H, ArH), 7.82 (d, *J* = 8.0 Hz, 1H, ArH), 7.53 – 7.59 (m, 2H, ArH), 7.44 – 7.47 (m, 2H, ArH), 7.39 – 7.42 (m, 1H, ArH), 7.33 – 7.38 (m, 3H, ArH), 2.69 (s, 3H, CH<sub>3</sub>); <sup>13</sup>C-NMR (125 MHz, CDCl<sub>3</sub>-d) δ 165.5, 162.6, 153.0, 153.0, 148.7, 141.9, 135.4, 133.1, 132.1, 131.9, 131.5, 130.4, 128.4, 126.7, 126.5, 126.1, 125.3, 124.1, 123.3, 121.4, 22.1.

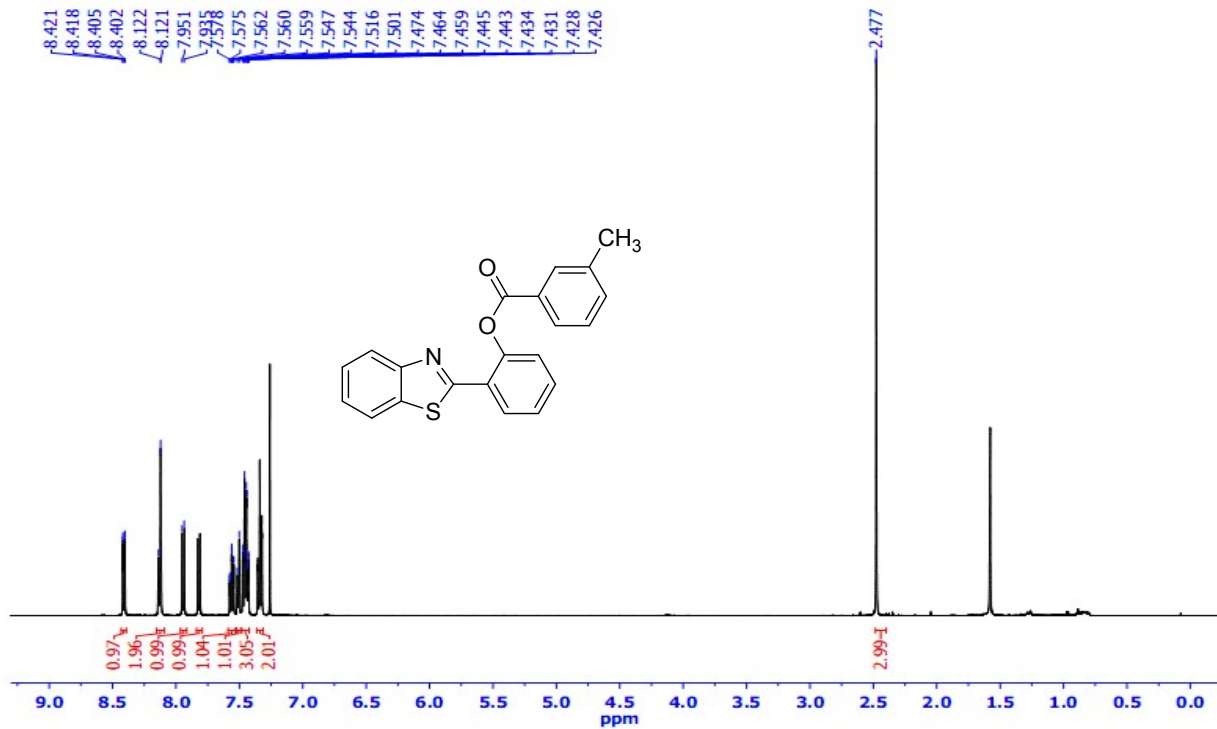

Fig. S9. <sup>1</sup>H-NMR spectra of 2-(benzo[d]thiazol-2-yl)phenyl 3-methylbenzoate.

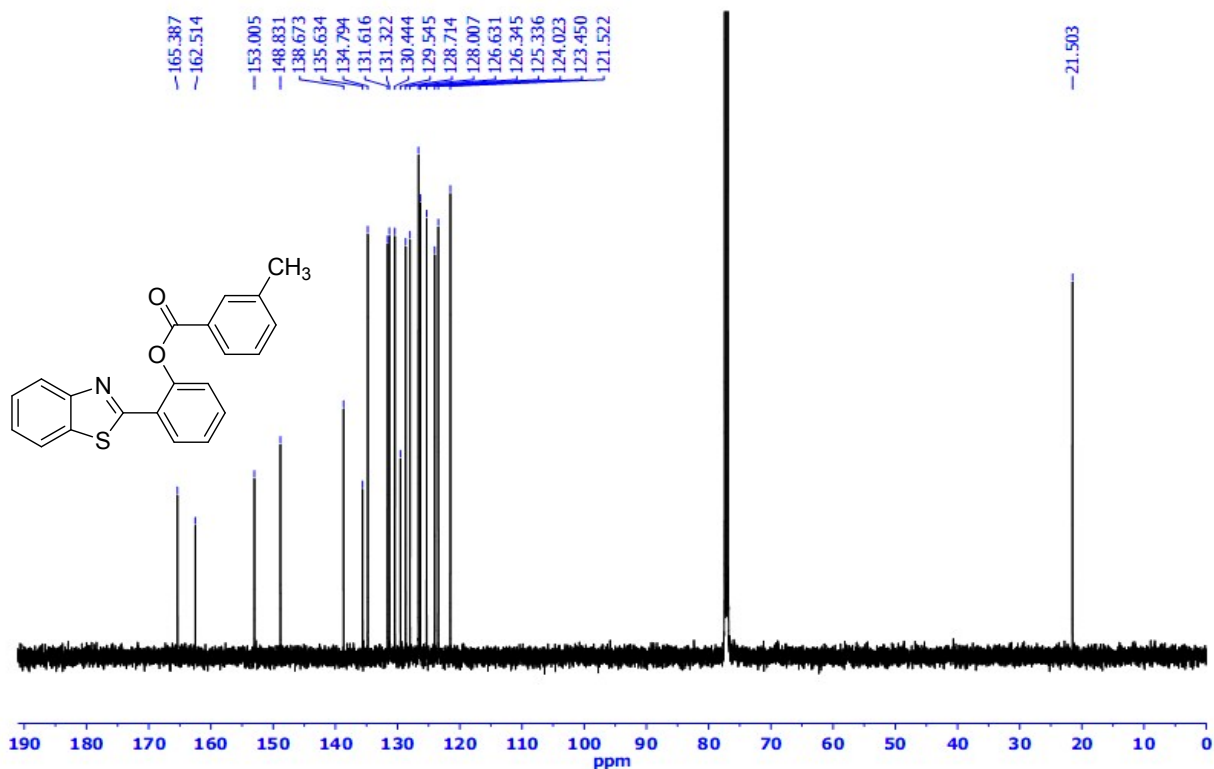

Fig. S10.  $^{13}\text{C}$ -NMR spectra of 2-(benzo[d]thiazol-2-yl)phenyl 3-methylbenzoate.

### Characterization Data for 2-(benzo[d]thiazol-2-yl)phenyl 3-methylbenzoate.

Prepared as shown in the general experimental procedure and purified on silica gel (hexane/ethyl acetate = 15:1): white solid, 88% yield.  $^1\text{H}$ -NMR (500 MHz,  $\text{CDCl}_3$ -*d*)  $\delta$  8.41 (dd,  $J = 7.9$  Hz,  $J = 1.6$  Hz, 1H, ArH), 8.12 – 8.14 (m, 2H, ArH), 7.94 (d,  $J = 8.1$  Hz, 1H, ArH), 7.82 (d,  $J = 8.1$  Hz, 1H, ArH), 7.53 – 7.59 (m, 1H, ArH), 7.50 – 7.52 (m, 1H, ArH), 7.42 – 7.48 (m, 3H, ArH), 7.31 – 7.36 (m, 2H, ArH), 2.48 (s, 3H,  $\text{CH}_3$ );  $^{13}\text{C}$ -NMR (125 MHz,  $\text{CDCl}_3$ -*d*)  $\delta$  165.4, 162.5, 153.0, 148.8, 138.6, 135.6, 134.8, 131.6, 131.3, 130.4, 129.5, 128.7, 128.0, 126.6, 126.3, 125.3, 124.0, 123.4, 121.5, 21.5.

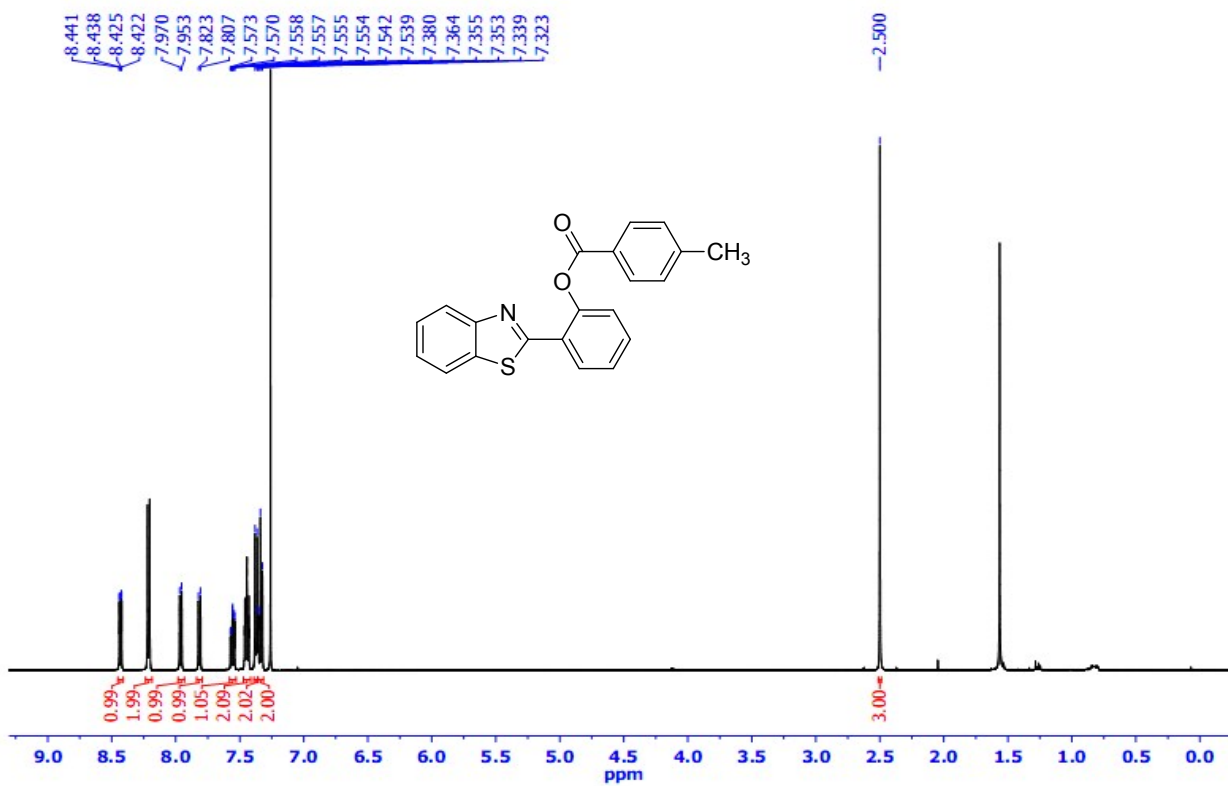

Fig. S11. <sup>1</sup>H-NMR spectra of 2-(benzo[d]thiazol-2-yl)phenyl 4-methylbenzoate.

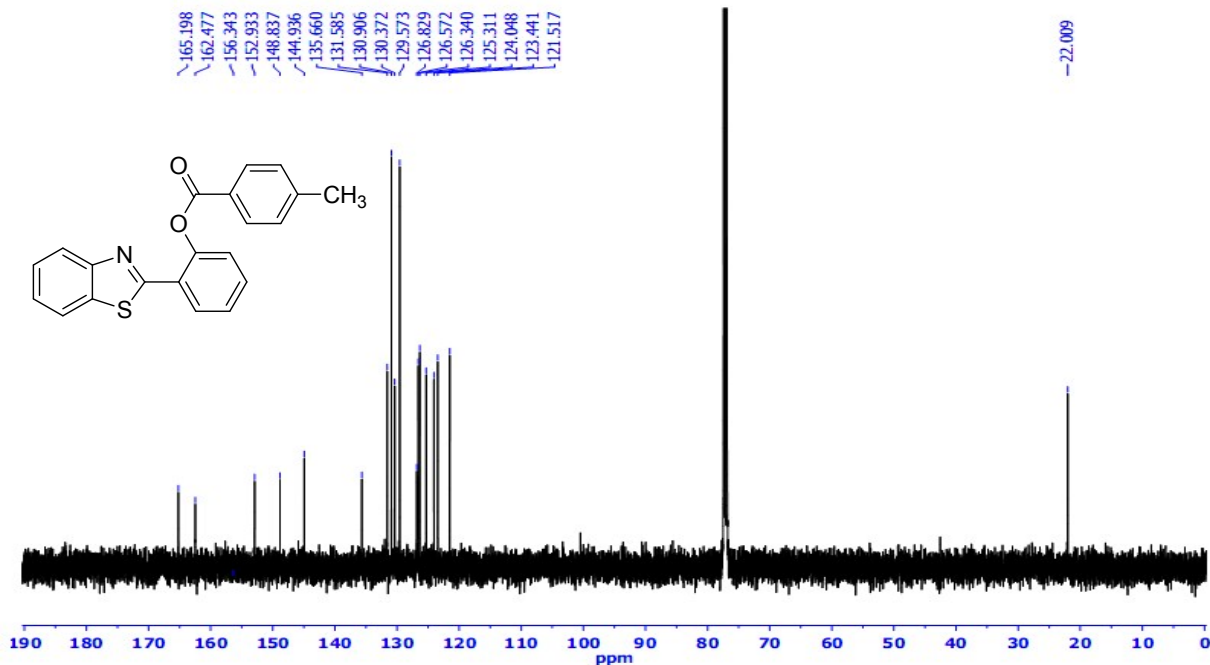

Fig. S12. <sup>13</sup>C-NMR spectra of 2-(benzo[d]thiazol-2-yl)phenyl 4-methylbenzoate.

### Characterization Data for 2-(benzo[d]thiazol-2-yl)phenyl 4-methylbenzoate.

Prepared as shown in the general experimental procedure and purified on silica gel (hexane/ethyl acetate = 10:1): white solid, 84% yield. <sup>1</sup>H-NMR (500 MHz, CDCl<sub>3</sub>-d) δ 8.43 (dd, *J* = 7.9 Hz, *J* = 1.6 Hz, 1H, ArH), 8.21 (d, *J* = 8.2 Hz, 2H, ArH), 7.96 (d, *J* = 8.2 Hz, 1H, ArH), 7.81 (d, *J* = 7.8 Hz, 1H, ArH), 7.54 – 7.57 (m, 1H, ArH), 7.42 – 7.46 (m, 2H, ArH), 7.35 – 7.38 (m, 2H, ArH), 7.32 – 7.34 (m, 2H, ArH), 2.50 (s, 3H, CH<sub>3</sub>); <sup>13</sup>C-NMR (125 MHz, CDCl<sub>3</sub>-d) δ 165.2, 162.5, 156.3, 152.3, 148.8, 144.4, 135.6, 131.6, 130.1, 130.4, 129.6, 126.8, 126.6, 126.3, 125.3, 124.0, 123.4, 121.5, 22.0.

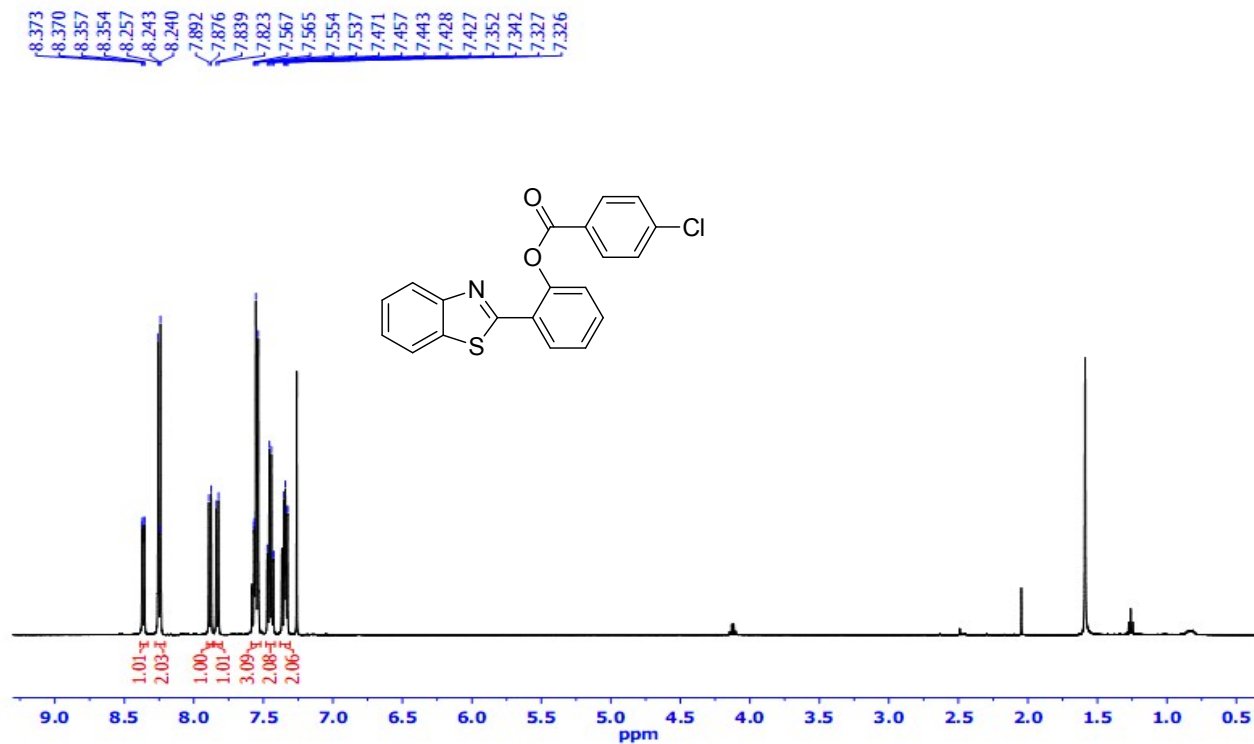

Fig. S13. <sup>1</sup>H-NMR spectra of 2-(benzo[d]thiazol-2-yl)phenyl 4-chlorobenzoate.

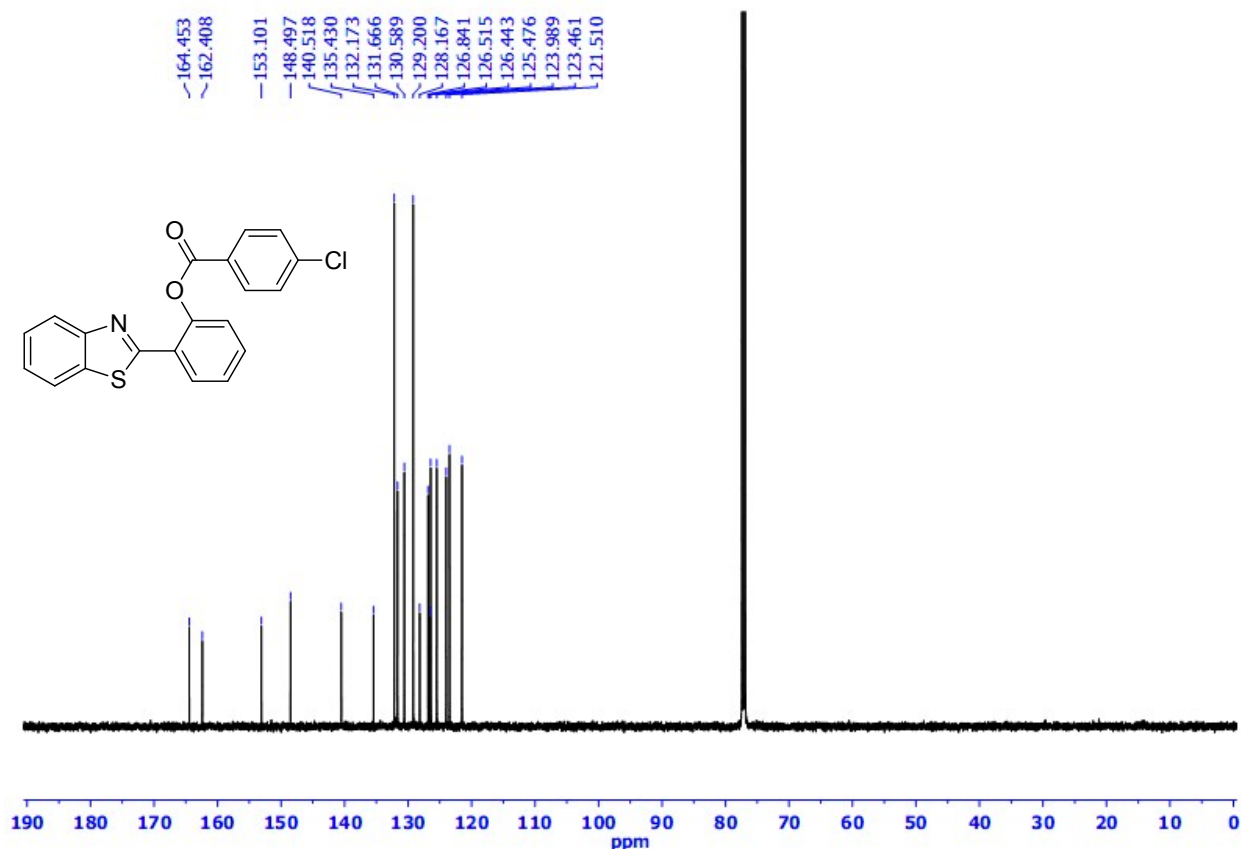

Fig. S14. <sup>13</sup>C-NMR spectra of 2-(benzo[d]thiazol-2-yl)phenyl 4-chlorobenzoate.

### Characterization Data for 2-(benzo[d]thiazol-2-yl)phenyl 4-chlorobenzoate.

Prepared as shown in the general experimental procedure and purified on silica gel (hexane/ethyl acetate = 10:1): white solid, 70% yield. <sup>1</sup>H-NMR (500 MHz, CDCl<sub>3</sub>-*d*) δ 8.36 (dd, *J* = 7.9 Hz, *J* = 1.5 Hz, 1H, Ar*H*), 8.28 – 8.21 (m, 2H, Ar*H*), 7.88 (d, *J* = 8.1 Hz, 1H, Ar*H*), 7.83 (d, *J* = 8.0 Hz, 1H, Ar*H*), 7.54 – 7.57 (m, 3H, Ar*H*), 7.43 – 7.47 (m, 2H, Ar*H*), 7.33 – 7.35 (m, 2H, Ar*H*); <sup>13</sup>C-NMR (125 MHz, CDCl<sub>3</sub>-*d*) δ 164.4, 162.4, 153.1, 148.5, 140.2, 135.4, 132.2, 131.6, 130.6, 129.2, 128.2, 126.8, 126.5, 126.4, 125.5, 124.0, 123.5, 121.5.



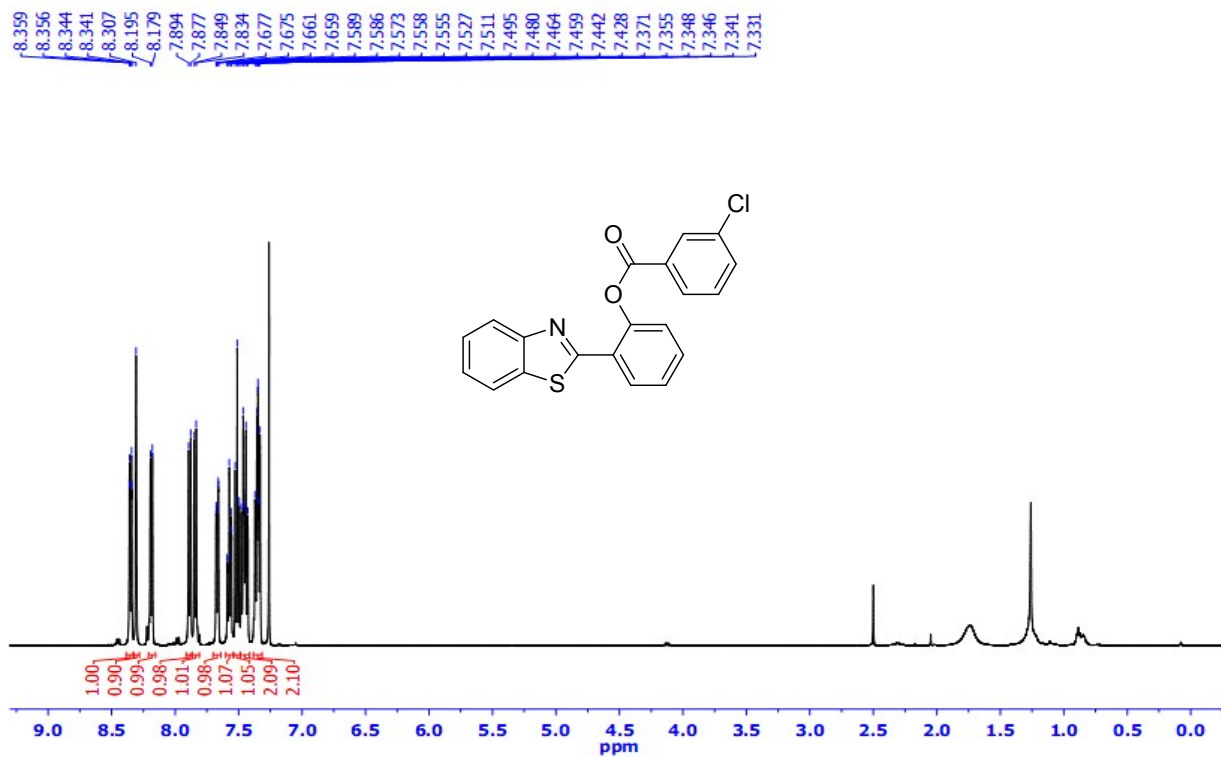

Fig. S15. <sup>1</sup>H-NMR spectra of 2-(benzo[d]thiazol-2-yl)phenyl 3-chlorobenzoate.

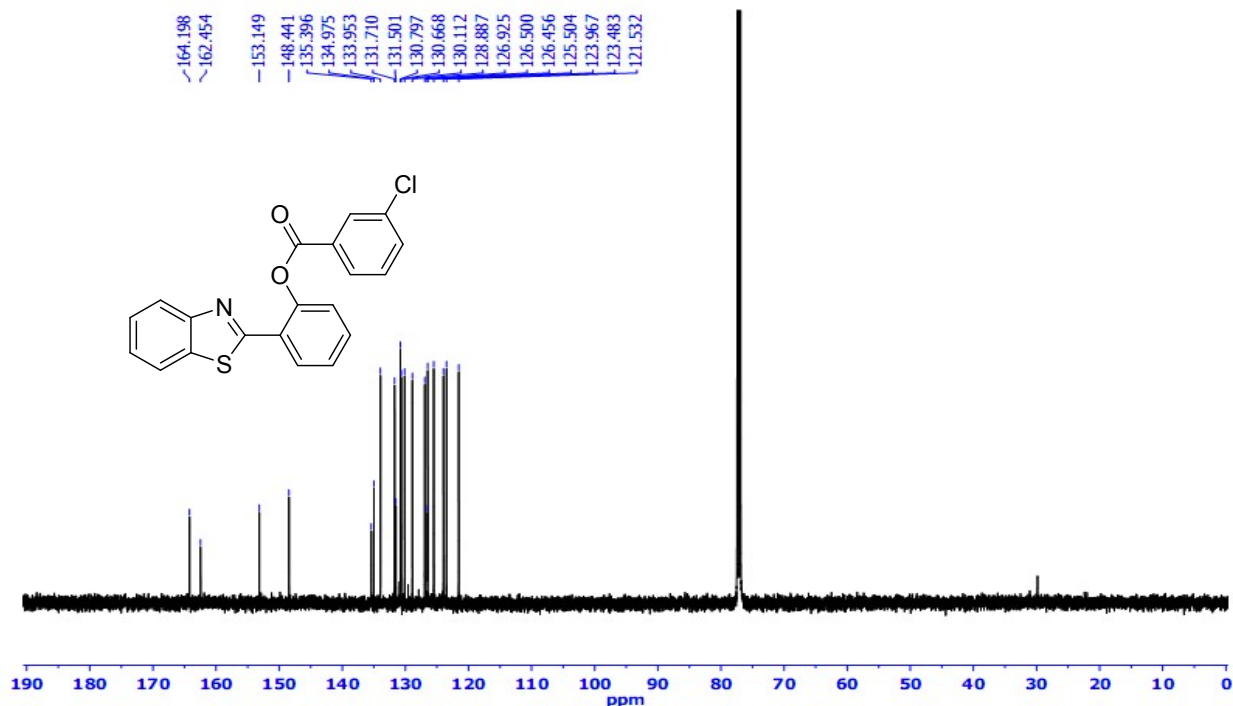

Fig. S16. <sup>13</sup>C-NMR spectra of 2-(benzo[d]thiazol-2-yl)phenyl 3-chlorobenzoate.

### Characterization Data for 2-(benzo[d]thiazol-2-yl)phenyl 3-chlorobenzoate.

Prepared as shown in the general experimental procedure and purified on silica gel (hexane/ethyl acetate = 10:1): white solid, 74% yield. <sup>1</sup>H-NMR (500 MHz, CDCl<sub>3</sub>-d) δ 8.35 (dd, *J* = 7.9 Hz, *J* = 1.5 Hz, 1H, Ar*H*), 8.31 (s, br, 1H, Ar*H*), 7.19 (d, *J* = 7.8 Hz, 1H, Ar*H*), 7.88 (d, *J* = 8.2 Hz, 1H, Ar*H*), 7.84 (d, *J* = 8.1 Hz, 1H, Ar*H*), 7.66 – 7.68 (m, 1H, Ar*H*), 7.56 – 7.59 (m, 1H, Ar*H*), 7.50 – 7.53 (m, 1H, Ar*H*), 7.43 – 7.48 (m, 2H, Ar*H*), 7.33 – 7.37 (m, 2H, Ar*H*); <sup>13</sup>C-NMR (125 MHz, CDCl<sub>3</sub>-d) δ 164.2, 162.4, 153.2, 148.4, 135.4, 134.9, 133.9, 131.7, 131.5, 130.8, 130.6, 130.1, 128.9, 126.9, 126.5, 126.5, 125.5, 123.9, 123.5, 121.5.

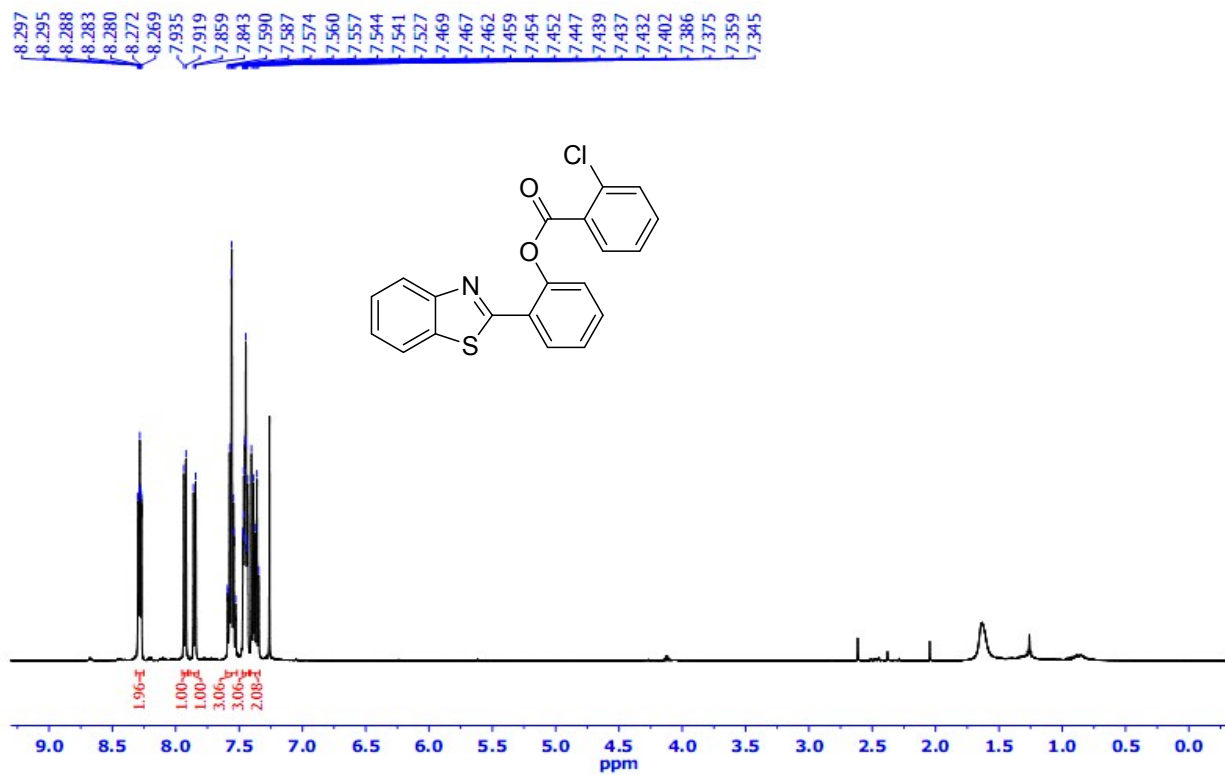

Fig. S17. <sup>1</sup>H-NMR spectra of 2-(benzo[d]thiazol-2-yl)phenyl 2-chlorobenzoate.

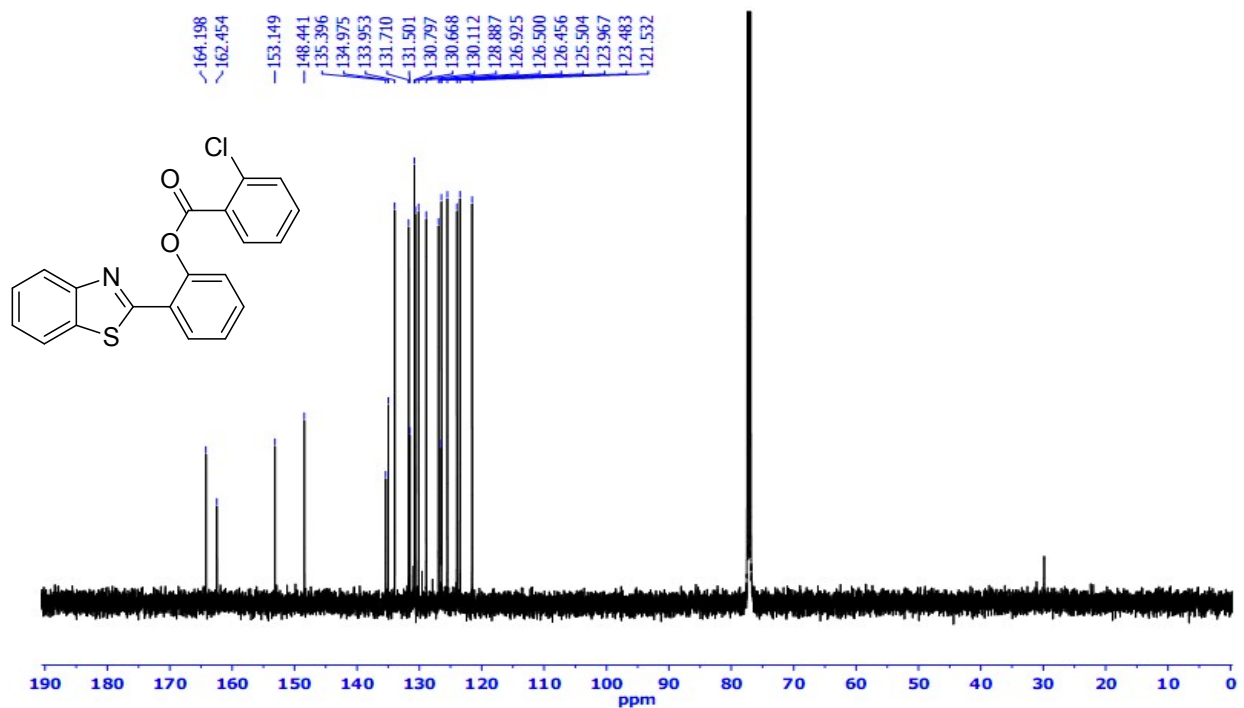

Fig. S18.  $^{13}\text{C}$ -NMR spectra of 2-(benzo[d]thiazol-2-yl)phenyl 2-chlorobenzoate.

### Characterization Data for 2-(benzo[d]thiazol-2-yl)phenyl 2-chlorobenzoate.

Prepared as shown in the general experimental procedure and purified on silica gel (hexane/ethyl acetate = 10:1): white solid, 71% yield.  $^1\text{H}$ -NMR (500 MHz,  $\text{CDCl}_3$ -*d*)  $\delta$  8.27 – 8.29 (m, 2H, ArH), 7.93 (d,  $J$  = 8.2 Hz, 1H, ArH), 7.85 (d,  $J$  = 8.0 Hz, 1H, ArH), 7.53 – 7.59 (m, 3H, ArH), 7.49 – 7.47 (m, 3H, ArH), 7.35 – 7.40 (m, 2H, ArH);  $^{13}\text{C}$ -NMR (125 MHz,  $\text{CDCl}_3$ -*d*)  $\delta$  164.2, 162.4, 153.2, 148.4, 135.4, 134.9, 133.9, 131.7, 131.5, 130.8, 130.6, 130.1, 128.9, 126.9, 126.5, 126.5, 125.5, 123.9, 123.5, 121.5.

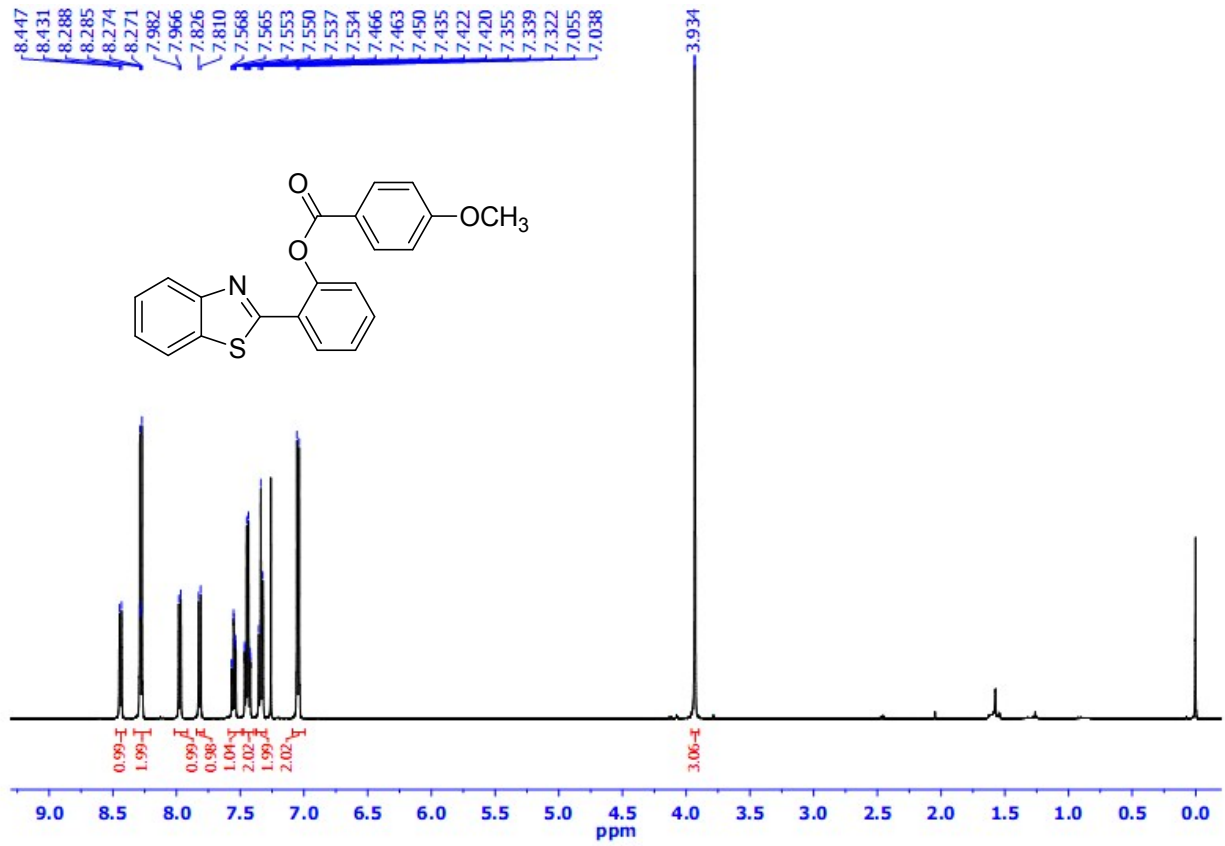

Fig. S19. <sup>1</sup>H-NMR spectra of 2-(benzo[d]thiazol-2-yl)phenyl 4-methoxybenzoate.

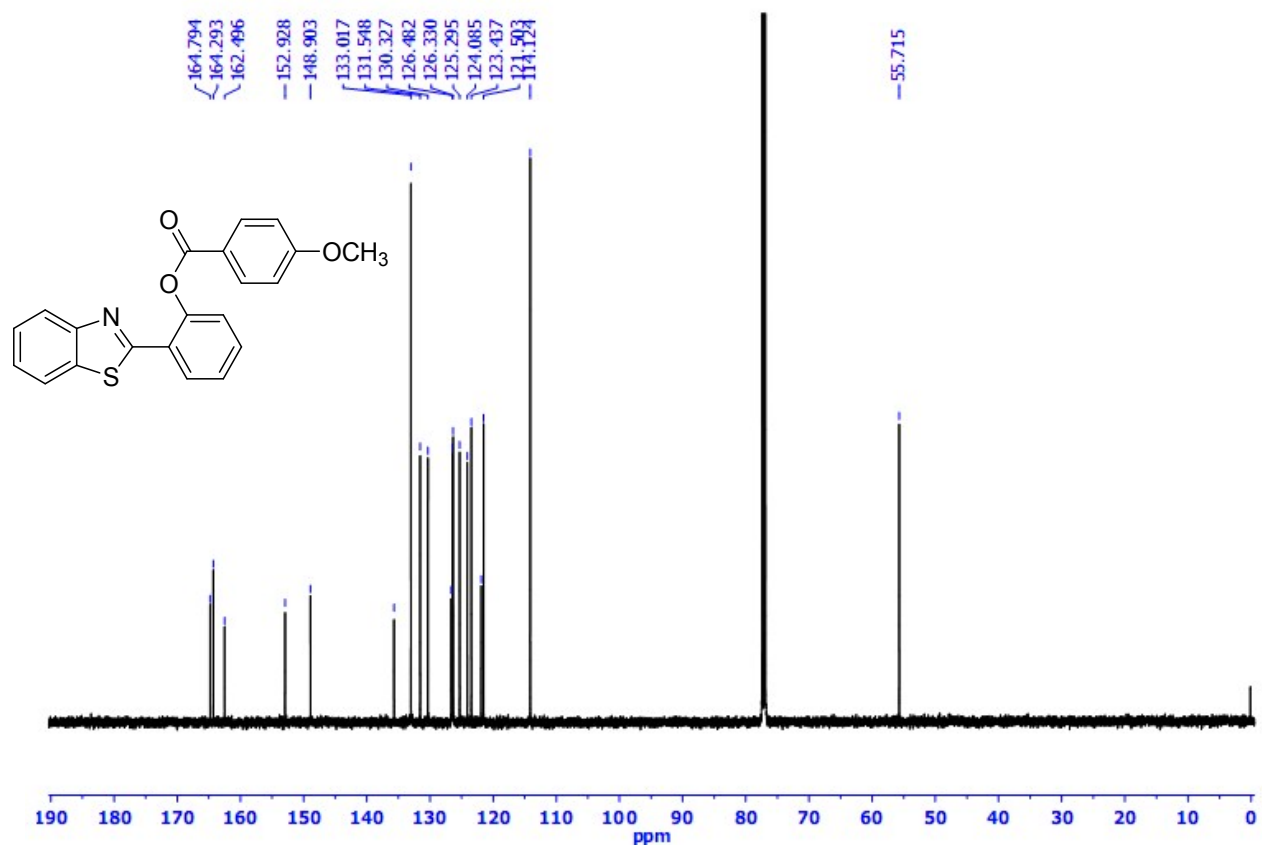

Fig. S20. <sup>13</sup>C-NMR spectra of 2-(benzo[d]thiazol-2-yl)phenyl 4-methoxybenzoate.

### Characterization Data for 2-(benzo[d]thiazol-2-yl)phenyl 4-methoxybenzoate.

Prepared as shown in the general experimental procedure and purified on silica gel (hexane/ethyl acetate = 9:1): white solid, 83% yield. <sup>1</sup>H NMR (500 MHz, CDCl<sub>3</sub>) δ 8.44 (d, *J* = 7.9 Hz, 1H, ArH), 8.33 – 8.20 (m, 2H, ArH), 7.97 (d, *J* = 8.2 Hz, 1H, ArH), 7.82 (d, *J* = 8.0 Hz, 1H, ArH), 7.55 (td, *J* = 7.8, 1.6 Hz, 1H, ArH), 7.44 (td, *J* = 7.8, 1.1 Hz, 2H, ArH), 7.34 (t, *J* = 8.2 Hz, 2H, ArH), 7.05 (d, *J* = 8.8 Hz, 2H, ArH), 3.93 (s, 3H, CH<sub>3</sub>); <sup>13</sup>C-NMR (125 MHz, CDCl<sub>3</sub>-*d*) δ 164.8, 164.3, 162.5, 152.9, 148.9, 135.7, 133.0, 131.6, 130.3, 126.6, 126.5, 126.3, 125.3, 124.1, 123.4, 121.9, 121.5, 114.1, 55.7.

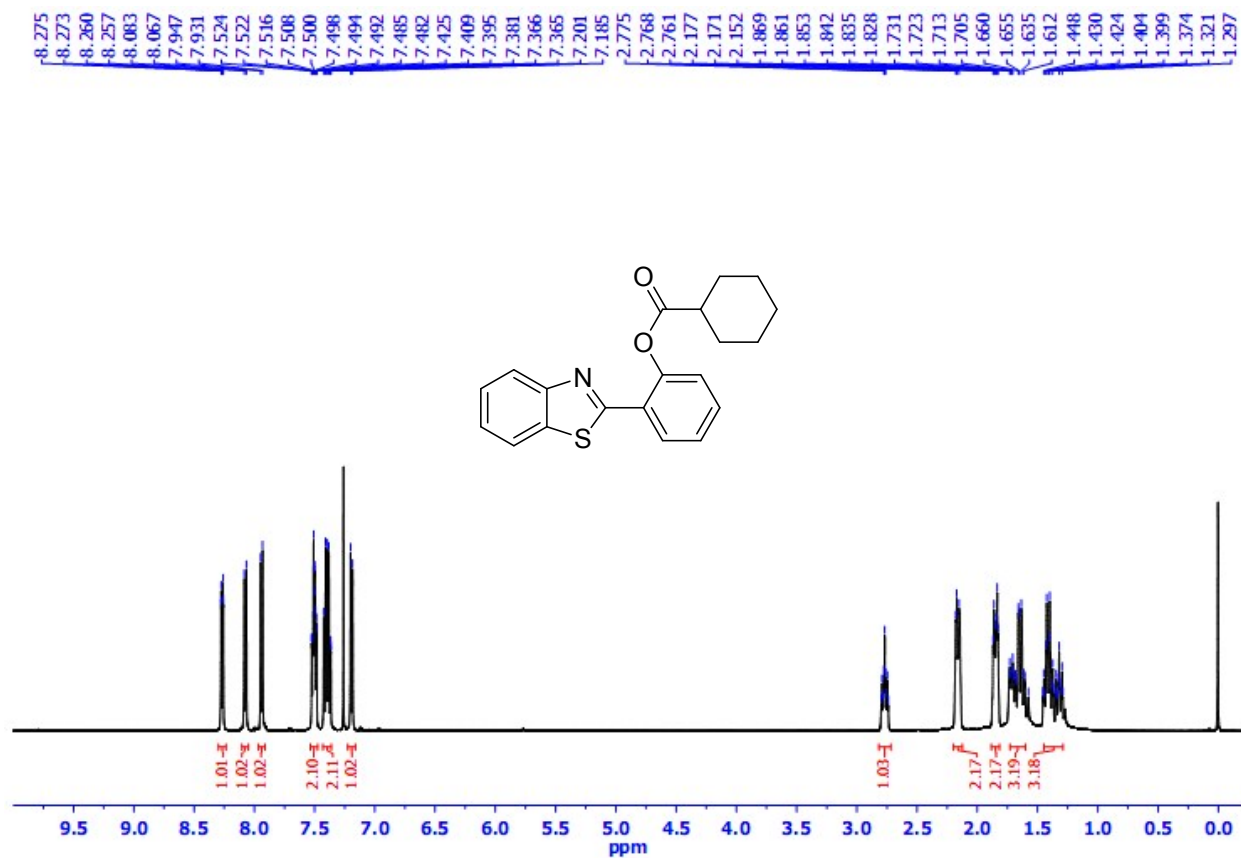

Fig. S21. <sup>1</sup>H-NMR spectra of 2-(benzo[d]thiazol-2-yl)phenyl cyclohexanecarboxylate.

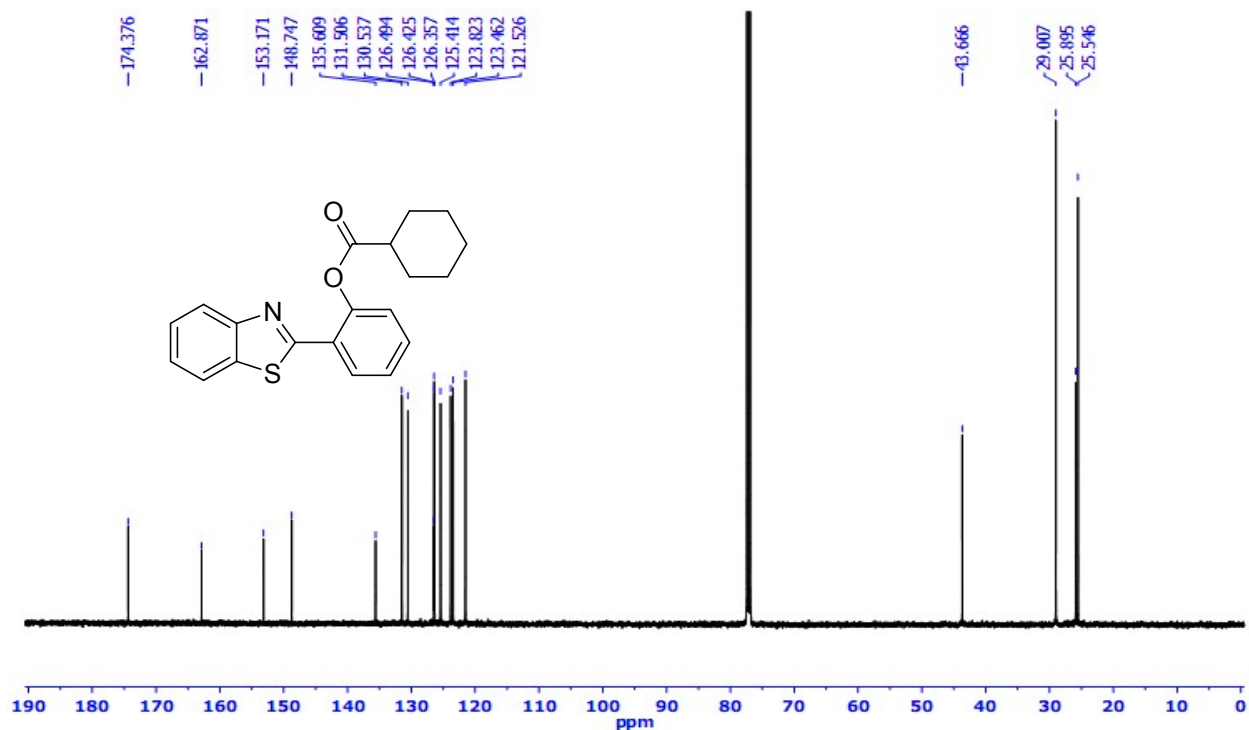

Fig. S22. <sup>13</sup>C-NMR spectra of 2-(benzo[d]thiazol-2-yl)phenyl cyclohexanecarboxylate.

### Characterization Data for 2-(benzo[d]thiazol-2-yl)phenyl cyclohexanecarboxylate.

Prepared as shown in the general experimental procedure and purified on silica gel (hexane/ethyl acetate = 9:1): yellow solid, 73% yield. <sup>1</sup>H NMR (500 MHz, CDCl<sub>3</sub>) δ 8.27 (dd, *J* = 7.8, 1.4 Hz, 1H, ArH), 8.07 (d, *J* = 8.2 Hz, 1H, ArH), 7.94 (d, *J* = 8.0 Hz, 1H, ArH), 7.48 – 7.52 (m, 2H, ArH), 7.43 – 7.36 (m, 2H, ArH), 7.19 (d, *J* = 8.1 Hz, 1H, ArH), 2.74– 2.80 (m, 1H, >CH-), 2.20 – 2.12 (m, 2H, CH<sub>2</sub>), 1.88 – 1.82 (m, 2H, CH<sub>2</sub>), 1.73 – 1.60 (m, 3H, CH<sub>2</sub>), 1.45 – 1.29 (m, 3H, CH<sub>2</sub>). <sup>13</sup>C-NMR (125 MHz, CDCl<sub>3</sub>-*d*) δ 174.3, 162.8, 153.1, 148.7, 135.6, 131.5, 130.5, 126.4, 126.4, 126.3, 125.4, 123.8, 123.4, 121.5, 43.6, 29.0, 25.8, 25.5.



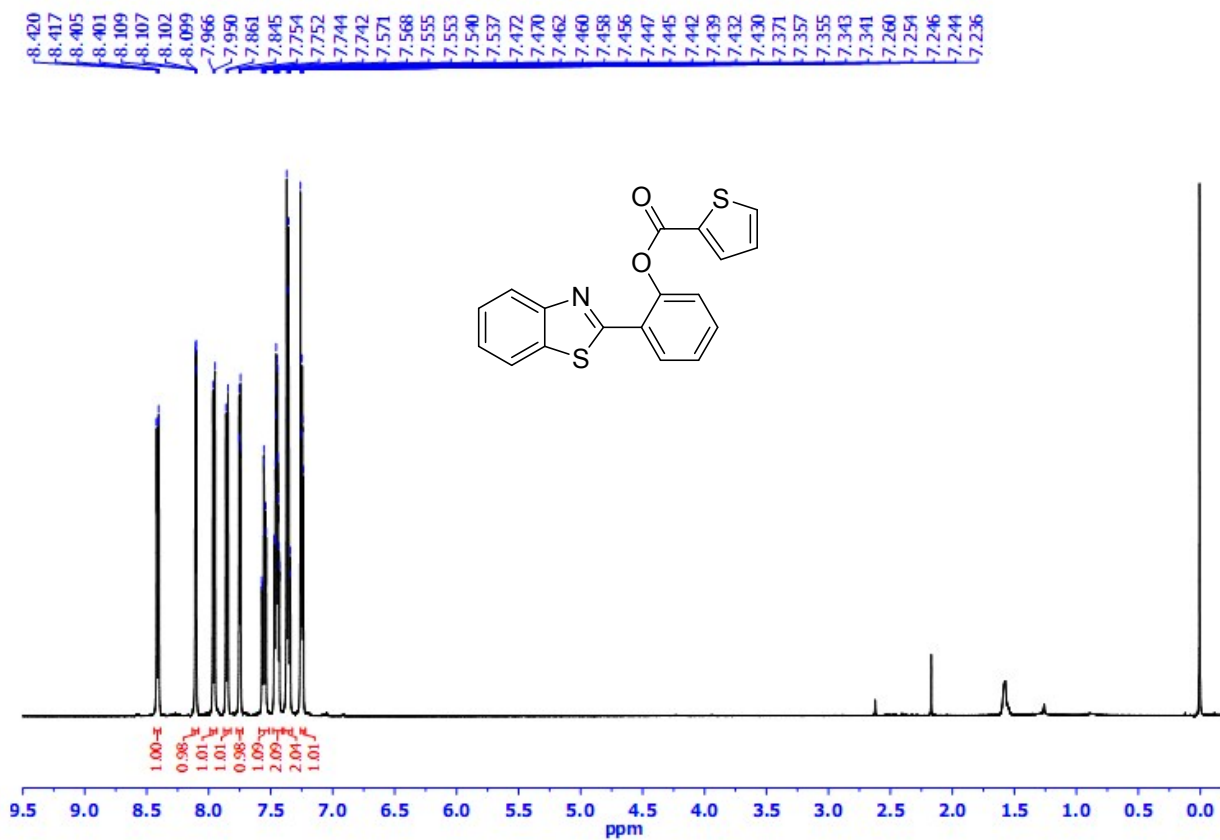

Fig. S23.  $^1\text{H-NMR}$  spectra of 2-(benzo[d]thiazol-2-yl)phenyl thiophene-2-carboxylate.

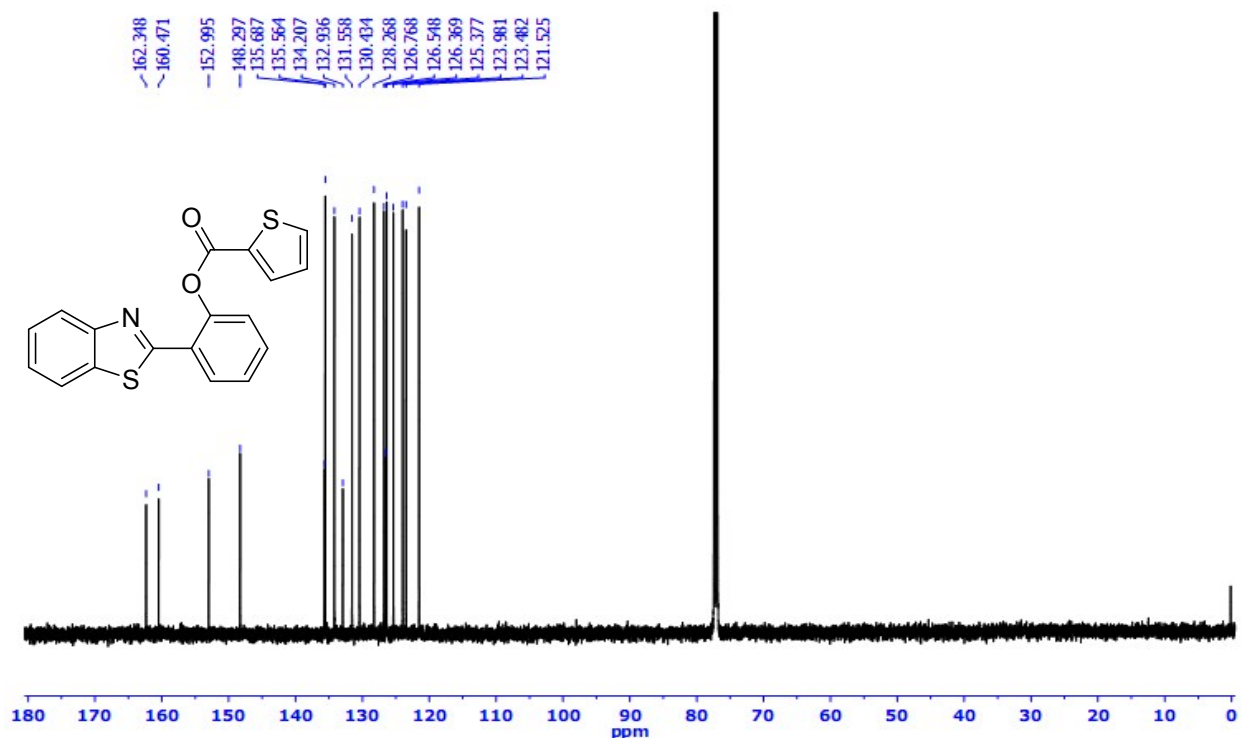

Fig. S24. <sup>13</sup>C-NMR spectra of 2-(benzo[d]thiazol-2-yl)phenyl thiophene-2-carboxylate.

#### Characterization Data for 2-(benzo[d]thiazol-2-yl)phenyl thiophene-2-carboxylate.

Prepared as shown in the general experimental procedure and purified on silica gel (hexane/ethyl acetate = 9:1): yellow solid, 56% yield. <sup>1</sup>H NMR (500 MHz, CDCl<sub>3</sub>) δ 8.41 (dd, *J* = 7.9, 1.6 Hz, 1H, *ArH*), 8.10 (dd, *J* = 3.8, 1.2 Hz, 1H, *ArH*), 7.96 (d, *J* = 8.1 Hz, 1H, *ArH*), 7.85 (d, *J* = 8.0 Hz, 1H, *ArH*), 7.75 (dd, *J* = 5.0, 1.1 Hz, 1H, *ArH*), 7.55 (td, *J* = 8.0, 1.6 Hz, 1H, *ArH*), 7.43 - 7.47 (m, 2H, *ArH*), 7.39 - 7.32 (m, 2H, *ArH*), 7.24 (dd, *J* = 4.9, 3.8 Hz, 1H, *ArH*); <sup>13</sup>C-NMR (125 MHz, CDCl<sub>3</sub>-*d*) δ 162.3, 160.4, 153.0, 148.30, 135.7, 135.5, 134.2, 132.9, 131.6, 130.4, 128.3, 126.8, 126.5, 126.4, 125.4, 123.9, 123.5, 121.5.

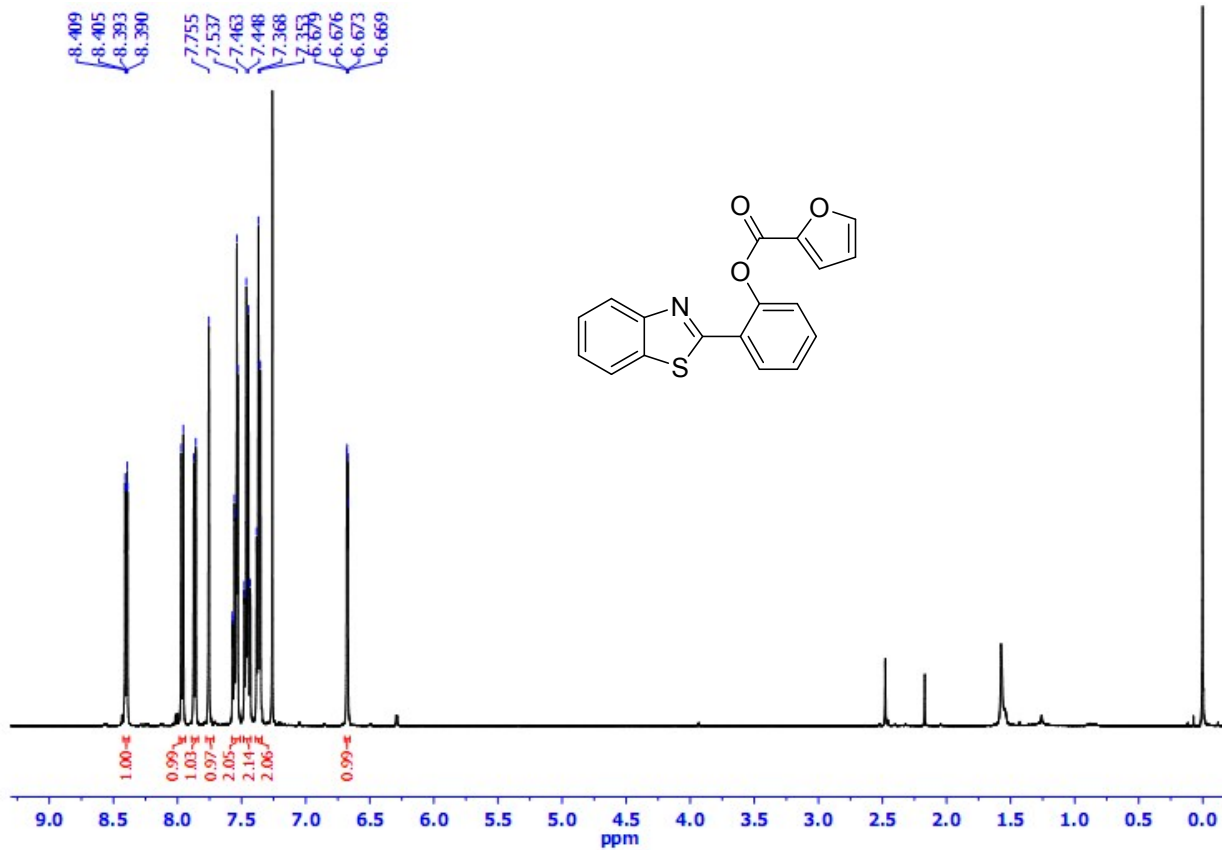

Fig. S25. <sup>1</sup>H-NMR spectra of 2-(benzo[d]thiazol-2-yl)phenyl furan-2-carboxylate.

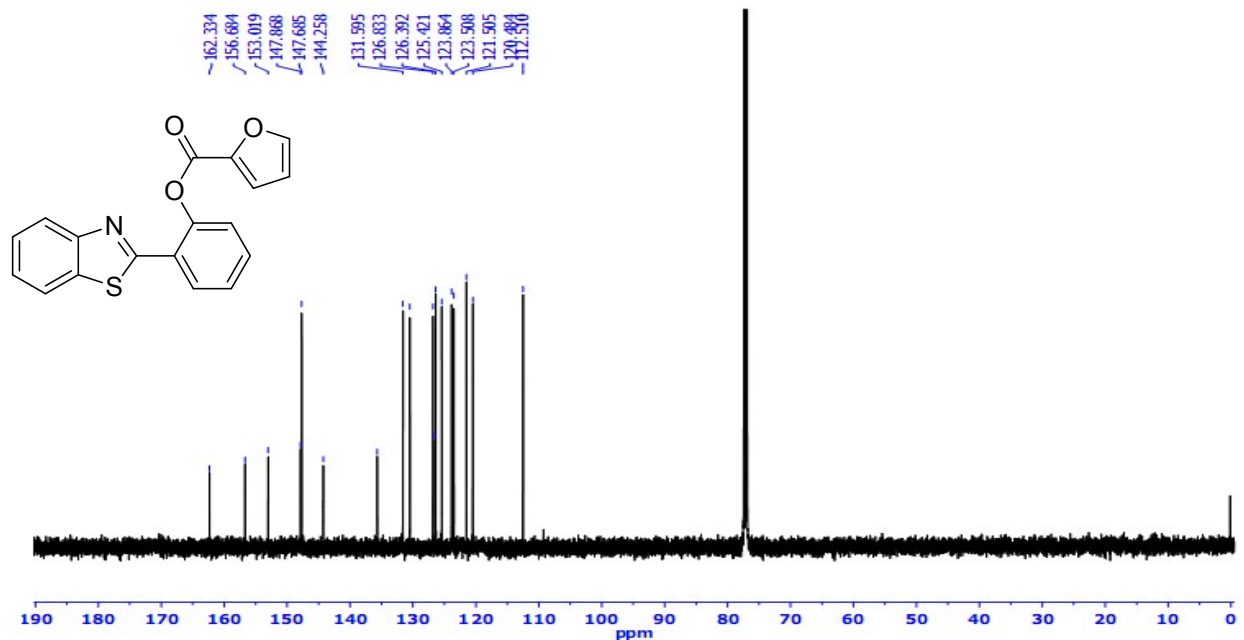

Fig. S26. <sup>13</sup>C-NMR spectra of 2-(benzo[d]thiazol-2-yl)phenyl furan-2-carboxylate.

**Characterization Data for 2-(benzo[d]thiazol-2-yl)phenyl furan-2-carboxylate.**

Prepared as shown in the general experimental procedure and purified on silica gel (hexane/ethyl acetate = 10:1): yellow solid, 59% yield. <sup>1</sup>H NMR (500 MHz, CDCl<sub>3</sub>-*d*) δ 8.40 (dd, *J* = 7.9, 1.6 Hz, 1H, Ar*H*), 7.96 (d, *J* = 8.2 Hz, 1H, Ar*H*), 7.86 (d, *J* = 8.0 Hz, 1H, Ar*H*), 7.76 (s, 1H, Ar*H*), 7.58 – 7.51 (m, 2H, Ar*H*), 7.48 – 7.43 (m, 2H, Ar*H*), 7.37 (t, *J* = 7.6 Hz, 2H, Ar*H*), 6.67 (dd, *J* = 3.5, 1.7 Hz, 1H, Ar*H*); <sup>13</sup>C-NMR (125 MHz, CDCl<sub>3</sub>-*d*) δ 162.3, 156.7, 153.0, 147.9, 147.7, 144.3, 135.7, 131.6, 130.5, 126.8, 126.5, 126.4, 125.4, 123.9, 123.5, 121.5, 120.5, 112.5.

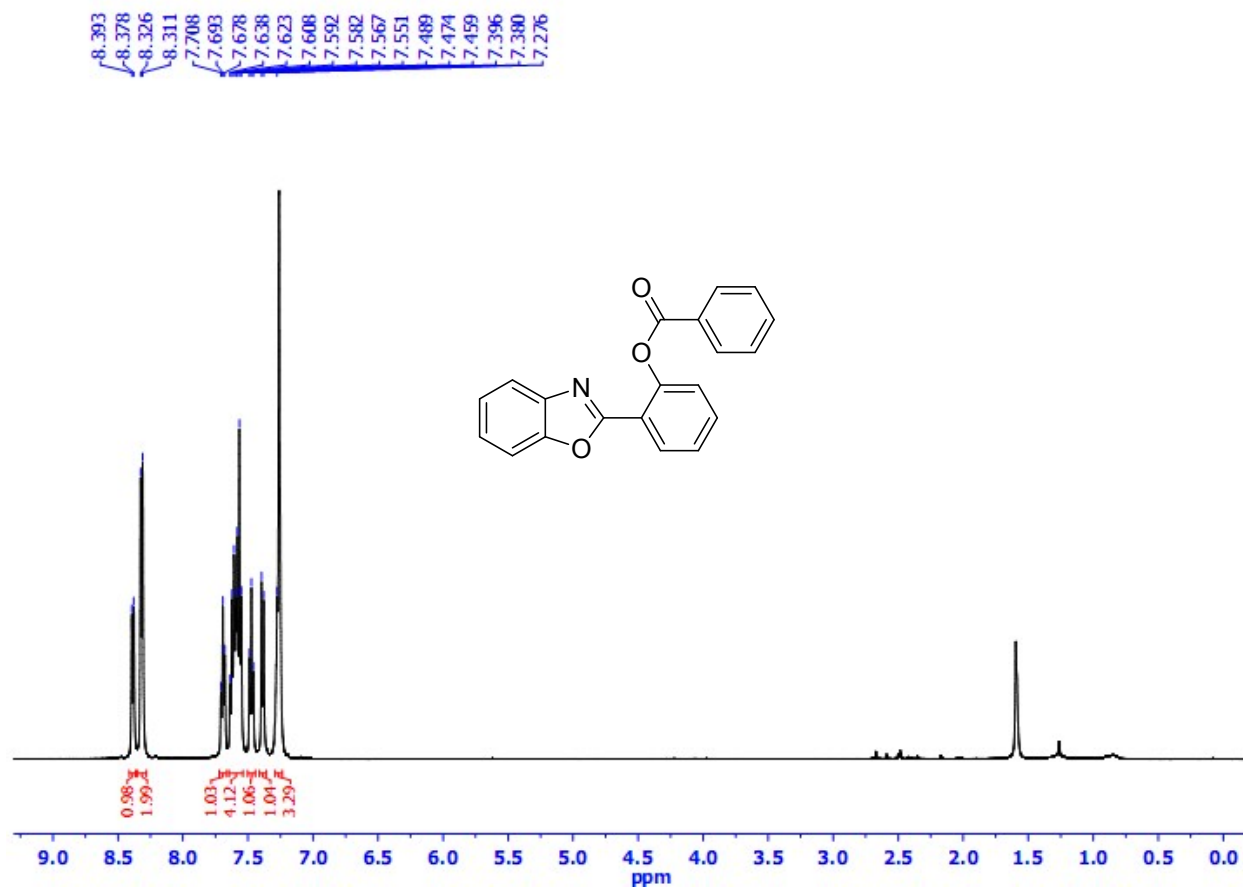

Fig. S27. <sup>1</sup>H-NMR spectra of 2-(benzo[d]oxazol-2-yl)phenyl benzoate.

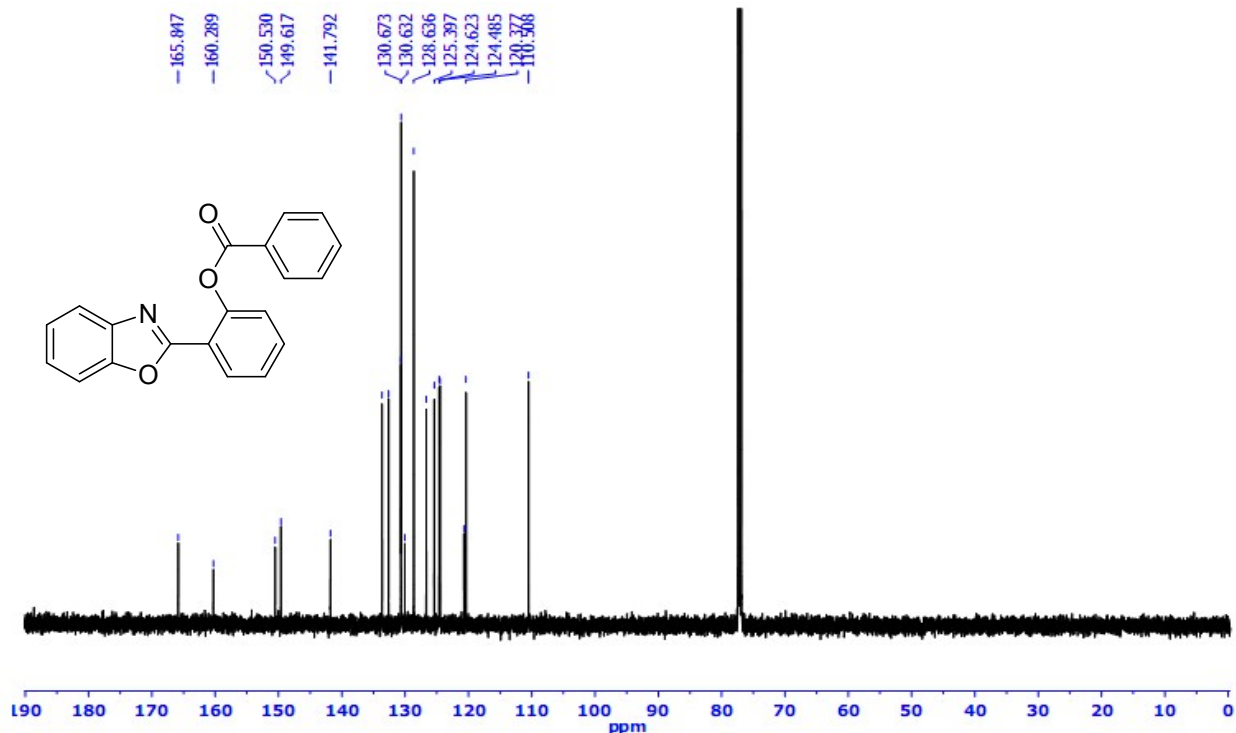

Fig. S28. <sup>13</sup>C-NMR spectra of 2-(benzo[d]oxazol-2-yl)phenyl benzoate.

#### Characterization Data for 2-(benzo[d]oxazol-2-yl)phenyl benzoate.

Prepared as shown in the general experimental procedure and purified on silica gel (hexane/ethyl acetate = 10:1): white solid, 55% yield. <sup>1</sup>H NMR (500 MHz, CDCl<sub>3</sub>-*d*) δ 8.39 (d, *J* = 7.4 Hz, 1H, Ar*H*), 8.32 (d, *J* = 7.5 Hz, 2H, Ar*H*), 7.69 (t, *J* = 7.4 Hz, 1H, Ar*H*), 7.65 – 7.54 (m, 4H, Ar*H*), 7.47 (t, *J* = 7.5 Hz, 1H, Ar*H*), 7.39 (d, *J* = 8.0 Hz, 1H, Ar*H*), 7.28 (s, 3H, Ar*H*); <sup>13</sup>C-NMR (125 MHz, CDCl<sub>3</sub>-*d*) δ 165.8, 160.3, 150.5, 149.6, 141.8, 133.6, 132.6, 130.7, 130.6, 130.0, 128.6, 126.7, 125.4, 124.6, 124.5, 120.7, 120.4, 110.5.

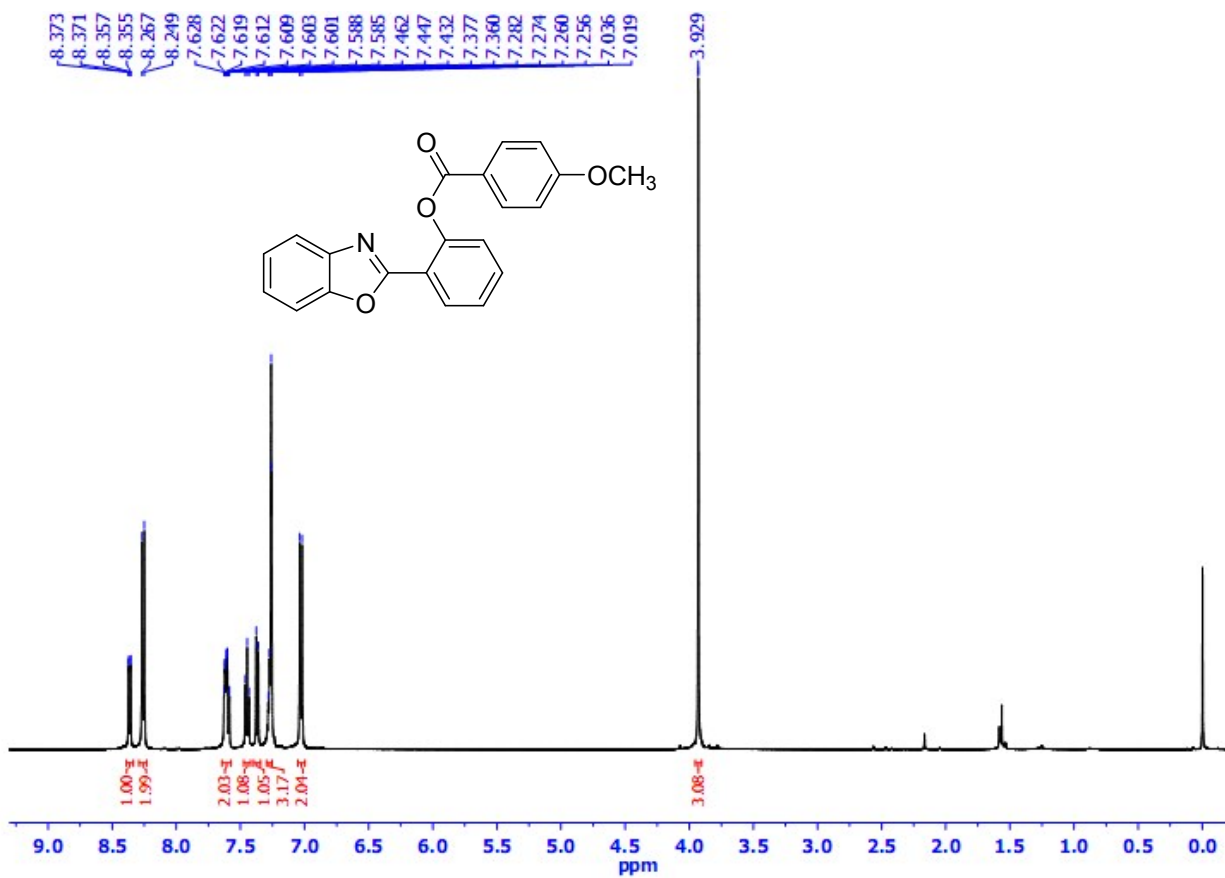

Fig. S29. <sup>1</sup>H-NMR spectra of 2-(benzo[d]oxazol-2-yl)phenyl 4-methoxybenzoate

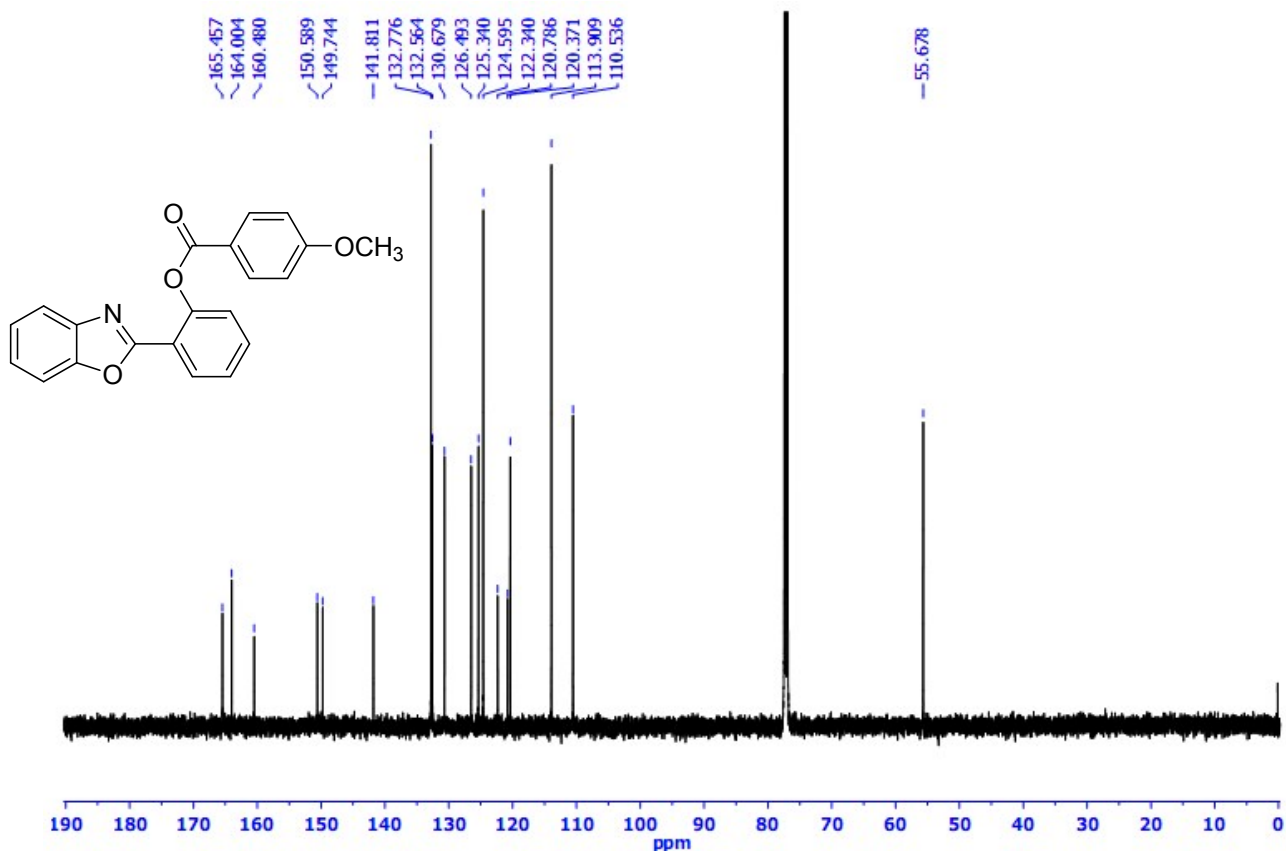

Fig. S30. <sup>13</sup>C-NMR spectra of 2-(benzo[d]oxazol-2-yl)phenyl 4-methoxybenzoate.

#### Characterization Data for 2-(benzo[d]oxazol-2-yl)phenyl 4-methoxybenzoate.

Prepared as shown in the general experimental procedure and purified on silica gel (hexane/ethyl acetate = 10:1): white solid, 75% yield. <sup>1</sup>H NMR (500 MHz, CDCl<sub>3</sub>-d) δ 8.36 (dd, *J* = 7.9, 1.3 Hz, 1H, ArH), 8.26 (d, *J* = 8.7 Hz, 2H, ArH), 7.64 – 7.57 (m, 2H, ArH), 7.45 (t, *J* = 7.6 Hz, 1H, ArH), 7.37 (d, *J* = 8.1 Hz, 1H, ArH), 7.27 (dd, *J* = 10.0, 3.1 Hz, 3H, ArH), 7.03 (d, *J* = 8.8 Hz, 2H, ArH), 3.93 (s, 3H, CH<sub>3</sub>); <sup>13</sup>C-NMR (125 MHz, CDCl<sub>3</sub>-d) δ 165.4, 164.0, 160.5, 150.6, 149.7, 141.8, 132.8, 132.5, 130.7, 126.5, 125.3, 124.6, 122.3, 120.8, 120.4, 113.9, 110.5, 55.6



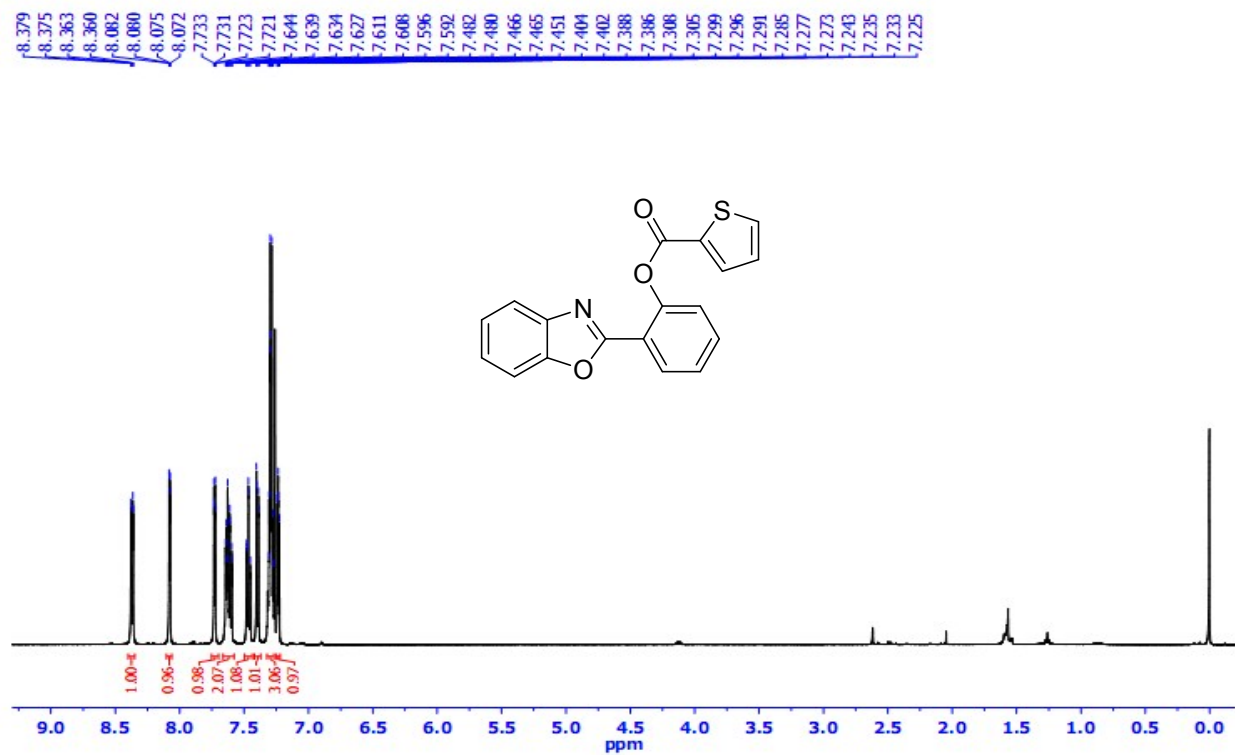

Fig. S31. <sup>1</sup>H-NMR spectra of 2-(benzo[d]oxazol-2-yl)phenyl thiophene-2-carboxylate.

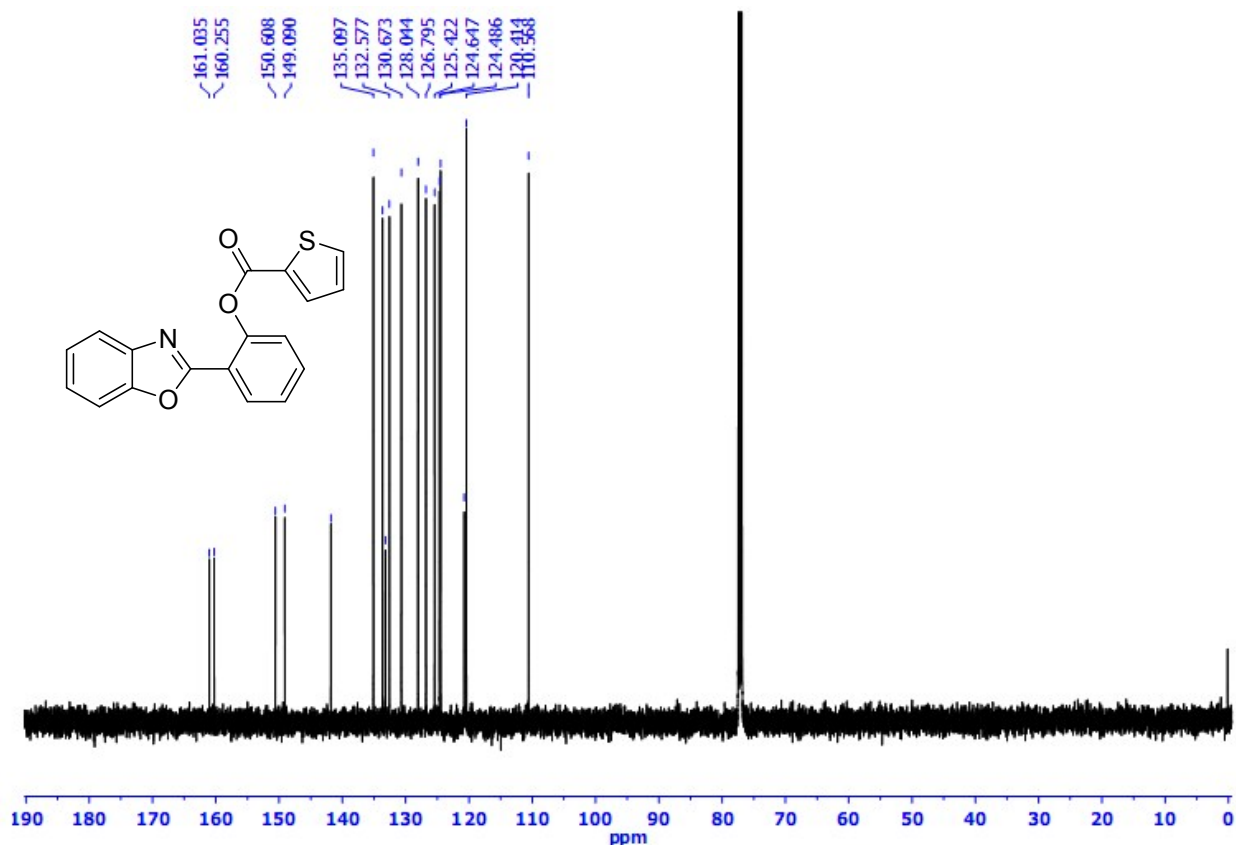

. Fig. S32. <sup>13</sup>C-NMR spectra of 2-(benzo[d]oxazol-2-yl)phenyl thiophene-2-carboxylate.

#### Characterization Data for 2-(benzo[d]oxazol-2-yl)phenyl thiophene-2-carboxylate.

Prepared as shown in the general experimental procedure and purified on silica gel (hexane/ethyl acetate = 9:1): yellow solid, 59 % yield. <sup>1</sup>H NMR (500 MHz, CDCl<sub>3</sub>-*d*) δ 8.37 (dd, *J* = 7.9, 1.6 Hz, 1H, *ArH*), 8.08 (dd, *J* = 3.7, 1.2 Hz, 1H, *ArH*), 7.73 (dd, *J* = 5.0, 1.0 Hz, 1H, *ArH*), 7.62 (ddd, *J* = 9.5, 6.5, 2.1 Hz, 2H, *ArH*), 7.49 – 7.44 (m, 1H, *ArH*), 7.39 (dd, *J* = 8.1, 0.9 Hz, 1H, *ArH*), 7.32 – 7.27 (m, 3H, *ArH*), 7.23 (dd, *J* = 4.9, 3.9 Hz, 1H, *ArH*); <sup>13</sup>C-NMR (125 MHz, CDCl<sub>3</sub>-*d*) δ 161.0, 160.2, 150.6, 149.1, 141.8, 135.1, 133.6, 133.2, 132.6, 130.7, 128.0, 126.8, 125.4, 124.6, 124.5, 120.7, 120.4, 110.6.

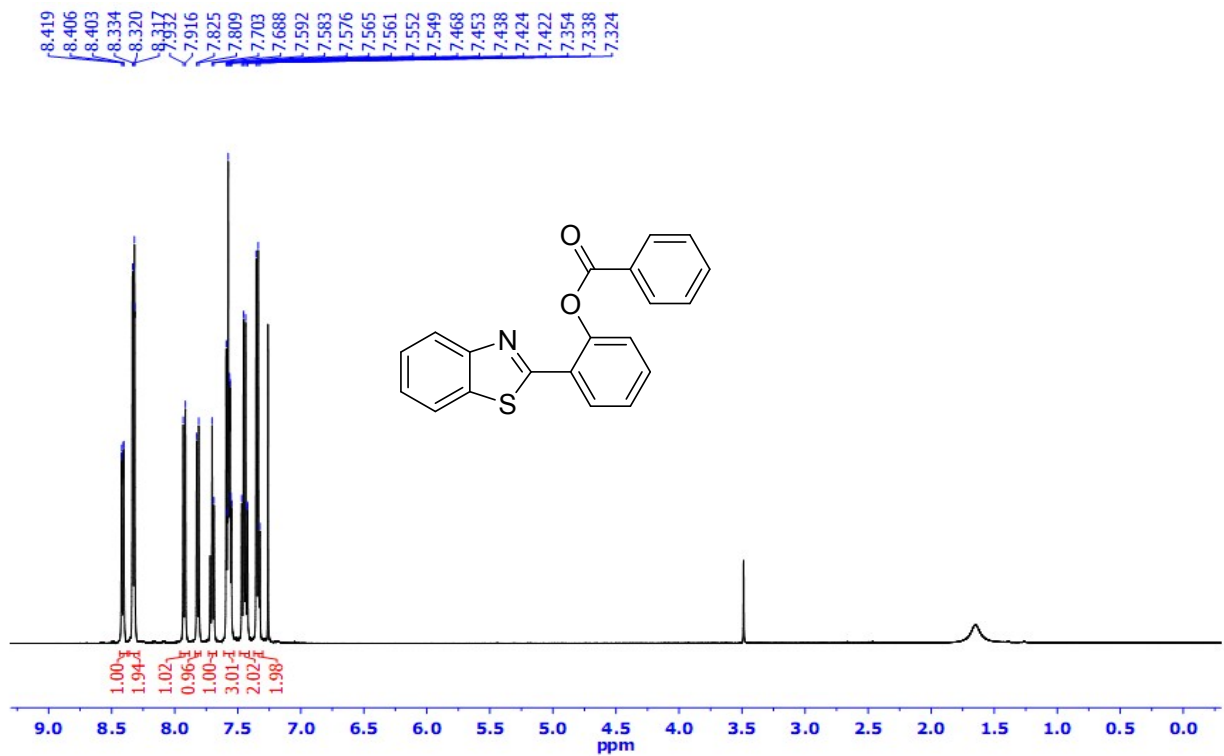

Fig. S33. <sup>1</sup>H-NMR spectra of 2-(benzo[d]thiazol-2-yl)phenyl benzoate.

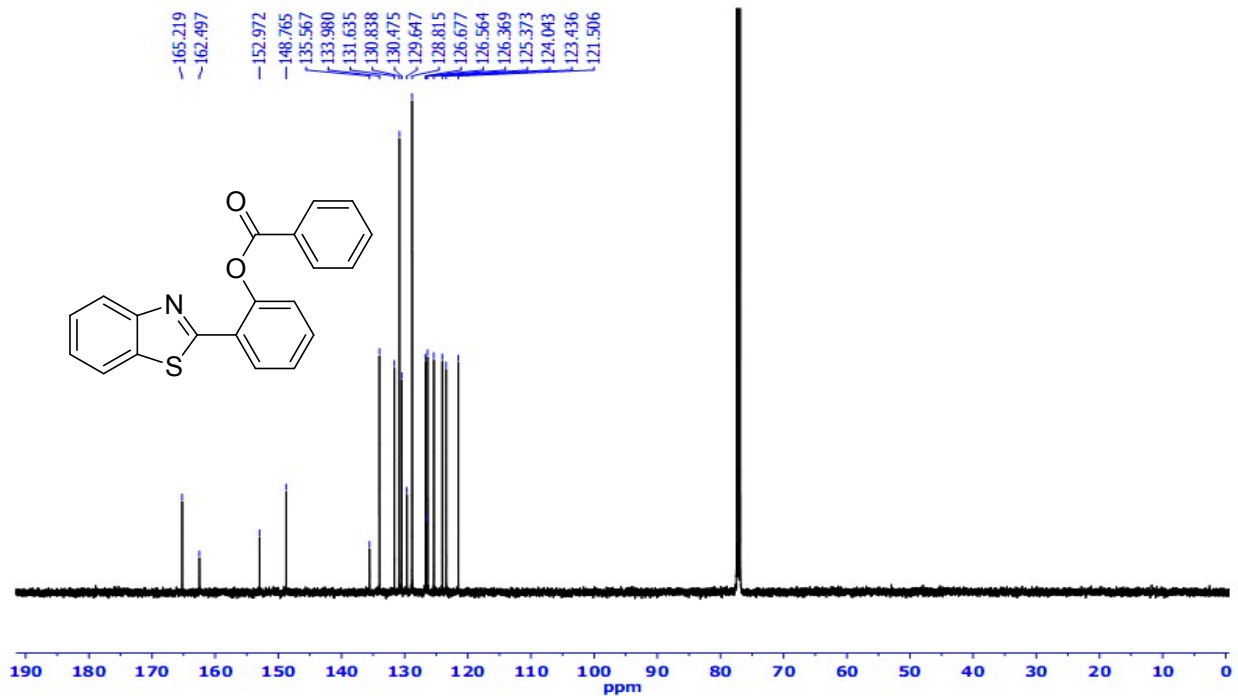

Fig. S34. <sup>13</sup>C-NMR of 2-(benzo[d]thiazol-2-yl)phenyl benzoate.

#### Characterization Data for 2-(benzo[d]thiazol-2-yl)phenyl benzoate.

Prepared as shown in the general experimental procedure and purified on silica gel (hexane/ethyl acetate = 10:1): yellow solid, 60% yield. <sup>1</sup>H-NMR (500 MHz, CDCl<sub>3</sub>-*d*) δ 8.41 (dd, *J* = 7.9 Hz, *J* = 1.5 Hz, 1H, Ar*H*), 8.31 – 8.33 (m, 2H, Ar*H*), 7.92 (d, *J* = 8.2 Hz, 1H, Ar*H*), 7.82 (d, *J* = 8.0 Hz, 1H, Ar*H*), 7.69 – 7.70 (m, 1H, Ar*H*), 7.53 – 7.61 (m, 3H, Ar*H*), 7.41 – 7.48 (m, 2H, Ar*H*), 7.32 – 7.35 (m, 2H, Ar*H*); <sup>13</sup>C-NMR (125 MHz, CDCl<sub>3</sub>-*d*) δ 165.2, 162.5, 152.9, 148.8, 135.6, 133.9, 131.6, 130.8, 130.5, 129.7, 128.8, 126.7, 126.6, 126.4, 125.4, 124.0, 123.4, 121.5.

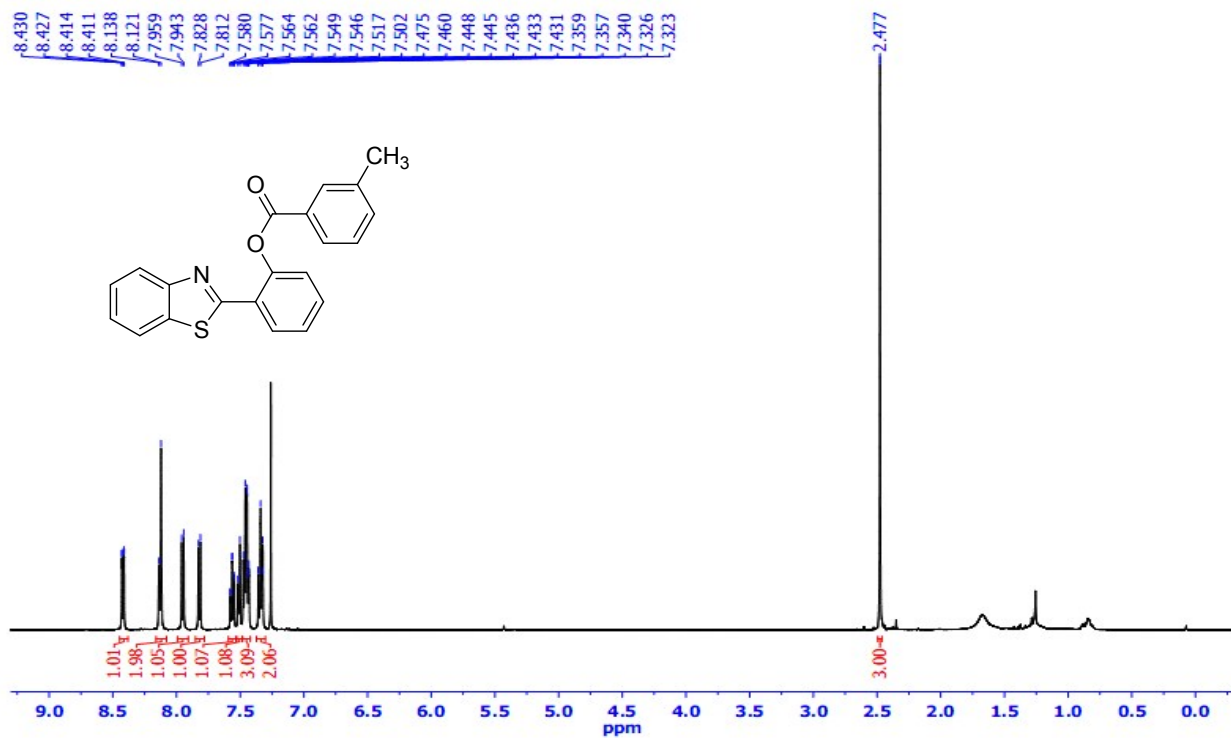

Fig. S35. <sup>1</sup>H-NMR spectra of 2-(benzo[d]thiazol-2-yl)phenyl 3-methylbenzoate.

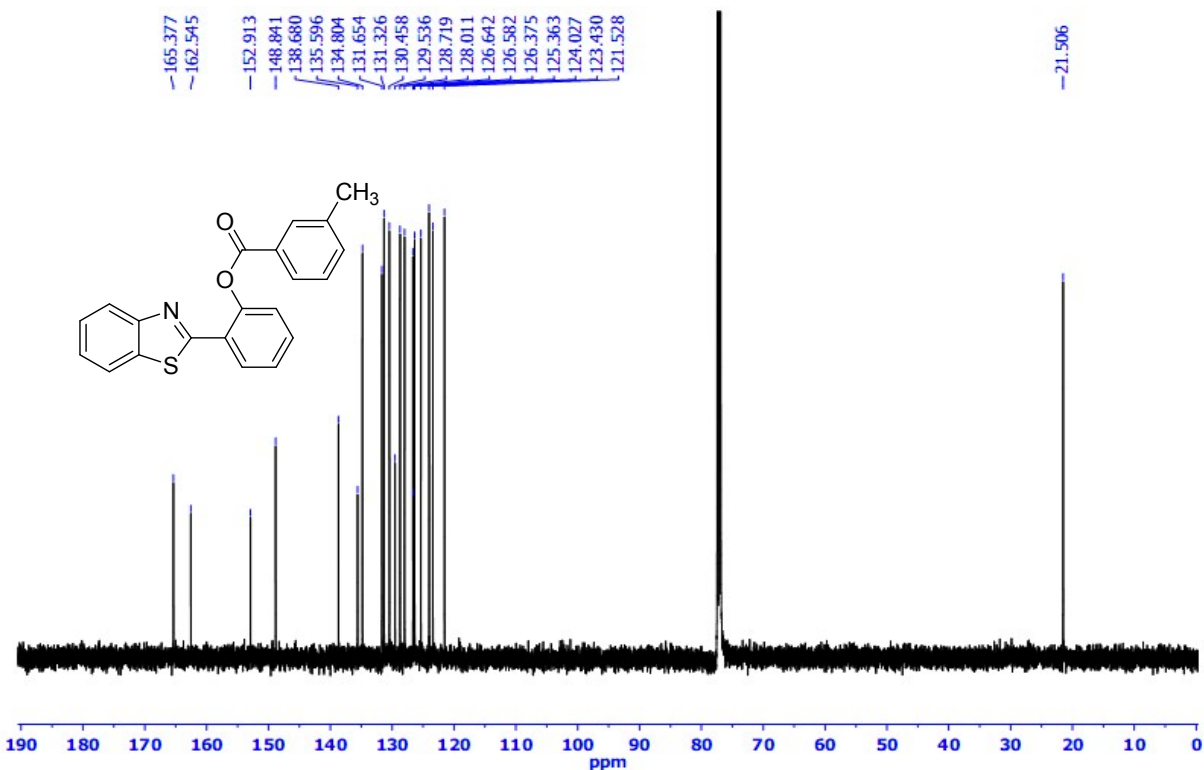

Fig. S36. <sup>13</sup>C-NMR spectra of 2-(benzo[d]thiazol-2-yl)phenyl 3-methylbenzoate.

### Characterization Data for 2-(benzo[d]thiazol-2-yl)phenyl 3-methylbenzoate.

Prepared as shown in the general experimental procedure and purified on silica gel (hexane/ethyl acetate = 15:1): white solid, 65% yield. <sup>1</sup>H-NMR (500 MHz, CDCl<sub>3</sub>-d) δ 8.42 (dd, *J* = 7.9 Hz, *J* = 1.5 Hz, 1H, ArH), 8.12 – 8.14 (m, 2H, ArH), 7.95 (d, *J* = 8.1 Hz, 1H, ArH), 7.82 (d, *J* = 8.0 Hz, 1H, ArH), 7.55 – 7.58 (m, 1H, ArH), 7.50 – 7.51 (m, 1H, ArH), 7.43 – 7.46 (m, 3H, ArH), 7.32 – 7.36 (m, 2H, ArH), 2.48 (s, 3H, CH<sub>3</sub>); <sup>13</sup>C-NMR (125 MHz, CDCl<sub>3</sub>-d) δ 165.4, 162.5, 152.9, 148.8, 138.7, 135.6, 134.8, 131.6, 131.3, 130.5, 129.5, 128.7, 128.0, 126.6, 126.58, 126.4, 125.4, 124.0, 123.4, 121.5, 21.5.

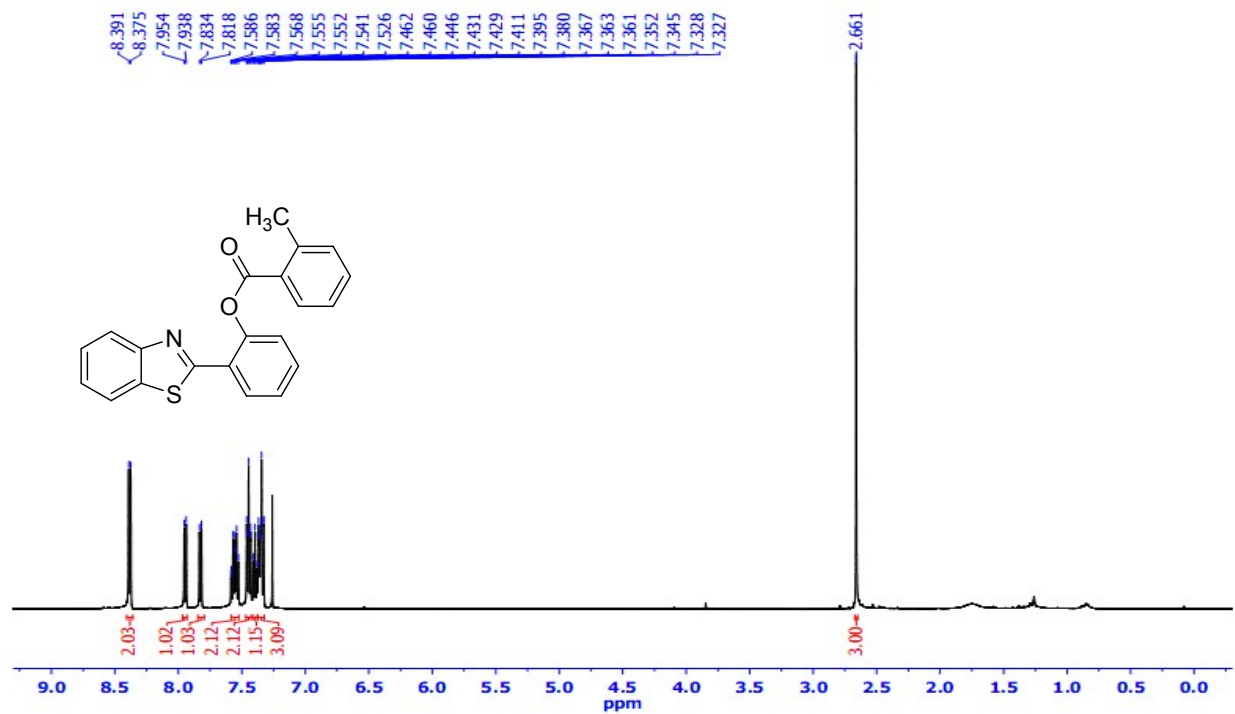

Fig. S37. <sup>1</sup>H-NMR spectra of 2-(benzo[d]thiazol-2-yl)phenyl 2-methylbenzoate.

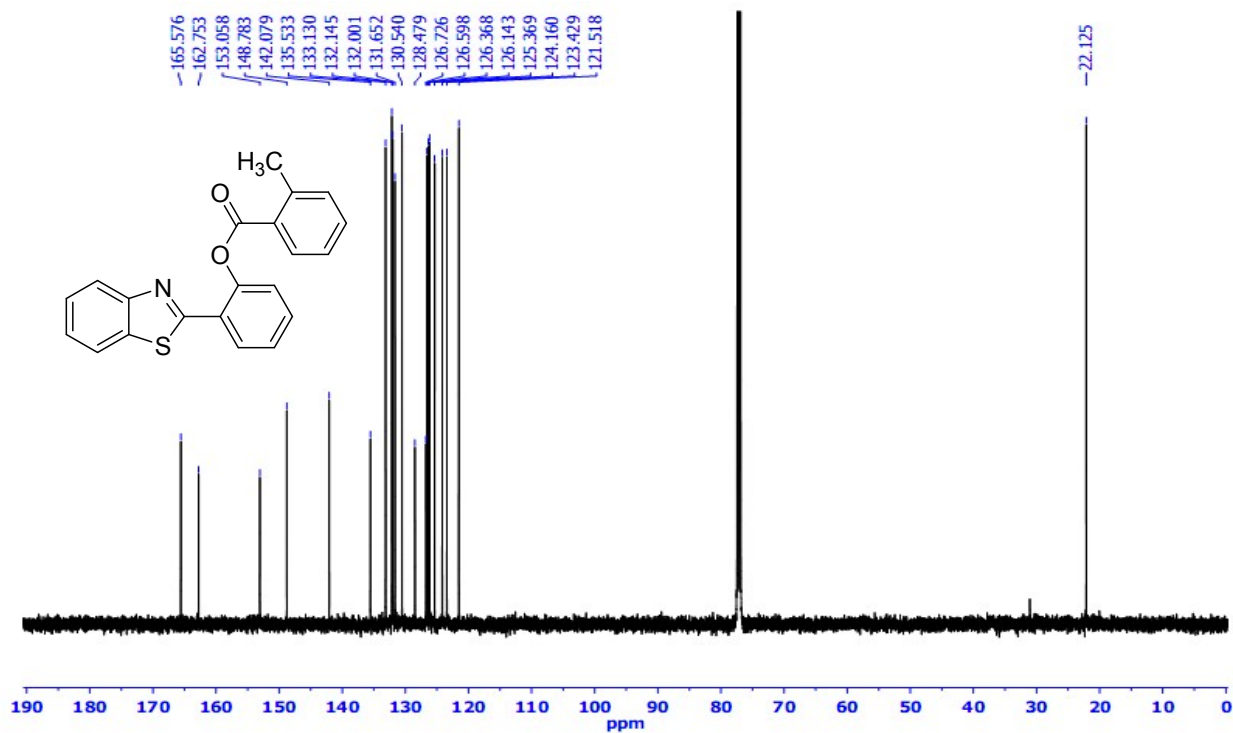

Fig. S38. <sup>13</sup>C-NMR spectra of 2-(benzo[d]thiazol-2-yl)phenyl 2-methylbenzoate.

#### Characterization Data for 2-(benzo[d]thiazol-2-yl)phenyl 2-methylbenzoate.

Prepared as shown in the general experimental procedure and purified on silica gel (hexane/ethyl acetate = 10:1): yellow gummy, 63% yield. <sup>1</sup>H-NMR (500 MHz, CDCl<sub>3</sub>-d) δ 8.38 (d, *J* = 7.9 Hz, 2H, Ar*H*), 7.95 (d, *J* = 8.2 Hz, 1H, Ar*H*), 7.82 (d, *J* = 8.0 Hz, 1H, Ar*H*), 7.53 – 7.59 (m, 2H, Ar*H*), 7.43 – 7.46 (m, 2H, Ar*H*), 7.38 – 7.41 (m, 1H, Ar*H*), 7.33 – 7.37 (m, 3H, Ar*H*), 2.66 (s, 3H, CH<sub>3</sub>); <sup>13</sup>C-NMR (125 MHz, CDCl<sub>3</sub>-d) δ 165.5, 162.7, 153.1, 148.8, 142.1, 135.5, 133.1, 132.1, 132.00, 131.6, 130.5, 128.5, 126.7, 126.6, 126.4, 126.1, 125.4, 124.2, 123.4, 121.5, 22.1.



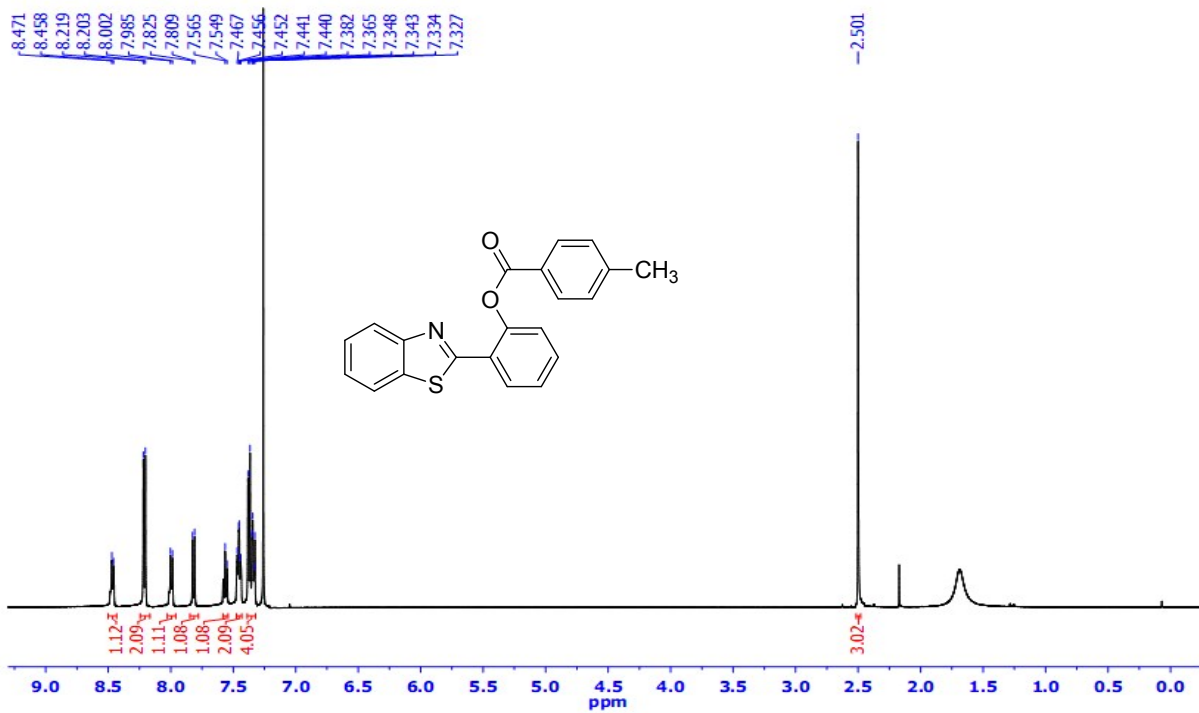

Fig. S39. <sup>1</sup>H-NMR spectra of 2-(benzo[d]thiazol-2-yl)phenyl 4-methylbenzoate.

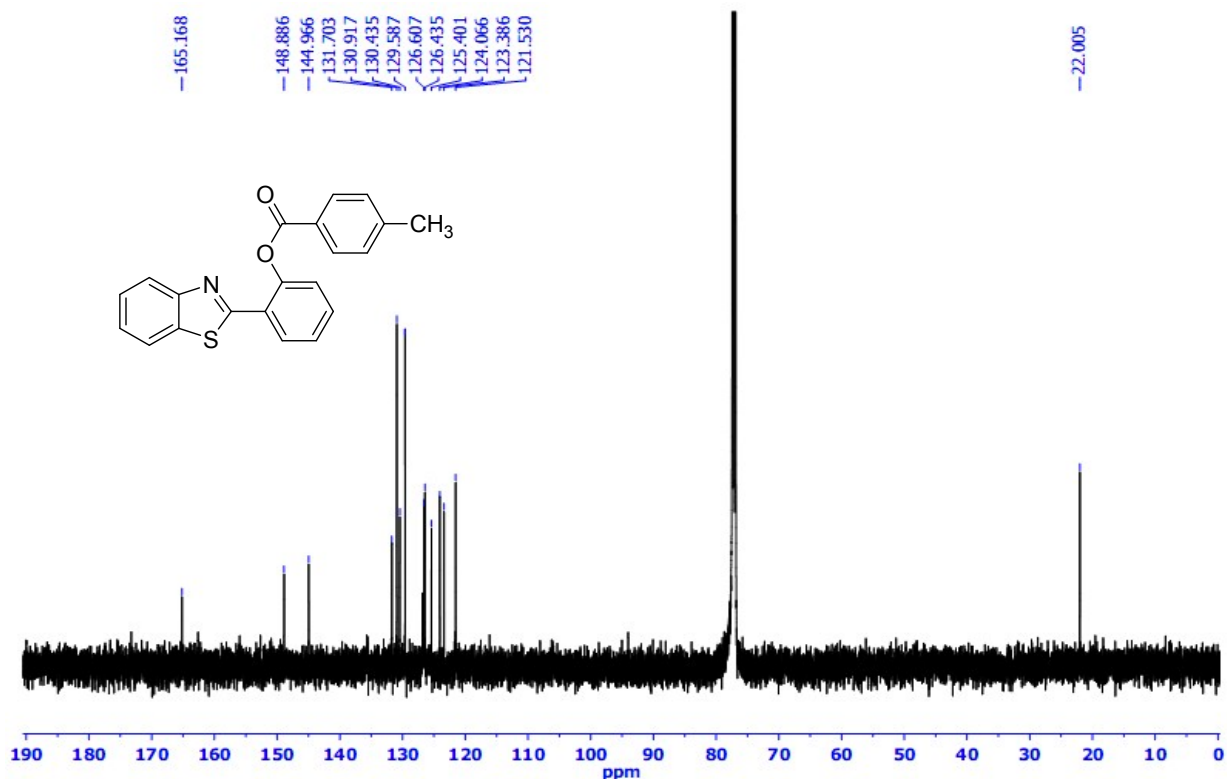

Fig. S40. <sup>13</sup>C-NMR spectra of 2-(benzo[d]thiazol-2-yl)phenyl 4-methylbenzoate.

#### Characterization Data for 2-(benzo[d]thiazol-2-yl)phenyl 4-methylbenzoate.

Prepared as shown in the general experimental procedure and purified on silica gel (hexane/ethyl acetate = 10:1): white solid, 75% yield. <sup>1</sup>H-NMR (500 MHz, CDCl<sub>3</sub>-*d*) δ 8.46 – 8.47 (m, 1H, ArH), 8.21 (d, *J* = 8.2 Hz, 2H, ArH), 7.99 (d, *J* = 8.0 Hz, 1H, ArH), 7.82 (d, *J* = 8.0 Hz, 1H, ArH), 7.55 – 7.57 (m, 1H, ArH), 7.44 – 7.47 (m, 2H, ArH), 7.33 – 7.38 (m, 4H, ArH), 2.50 (s, 3H, CH<sub>3</sub>); <sup>13</sup>C-NMR (125 MHz, CDCl<sub>3</sub>-*d*) δ 165.2, 148.9, 144.9, 131.7, 130.9, 130.4, 129.6, 126.6, 126.4, 125.4, 124.2, 123.4, 121.5, 22.0.

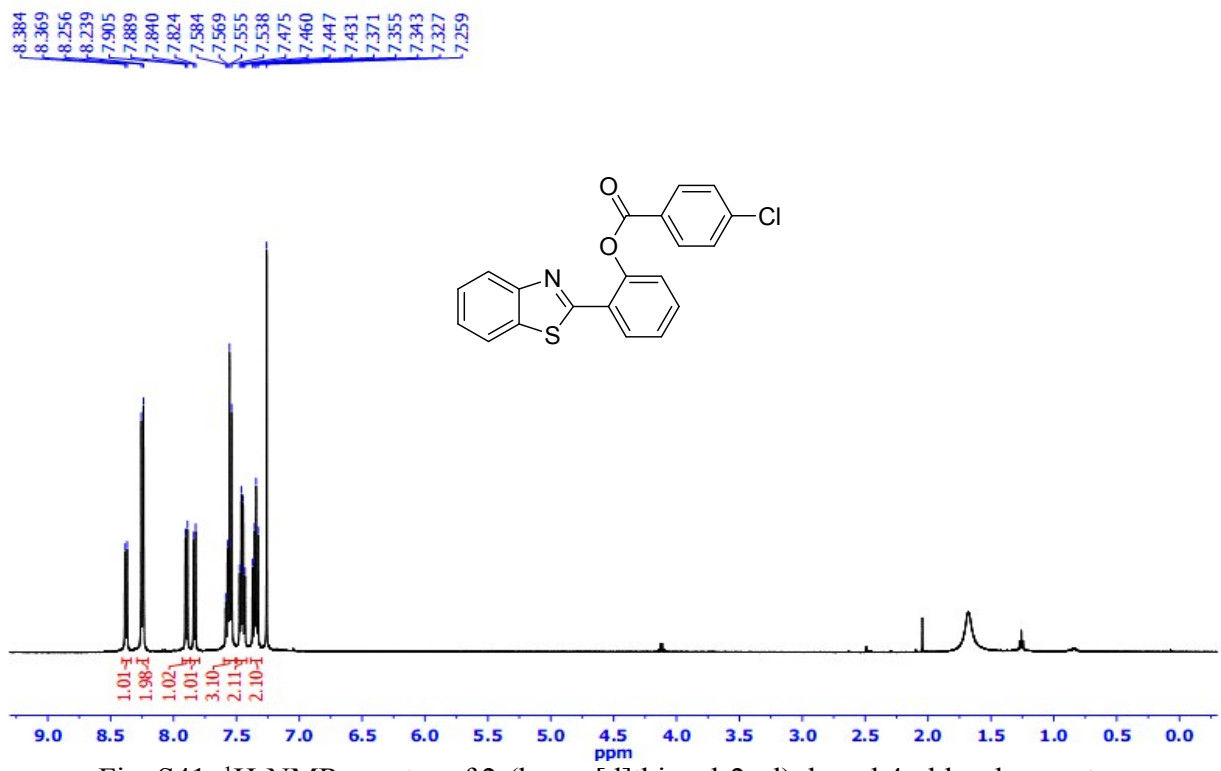

Fig. S41. <sup>1</sup>H-NMR spectra of 2-(benzo[d]thiazol-2-yl)phenyl 4-chlorobenzoate.

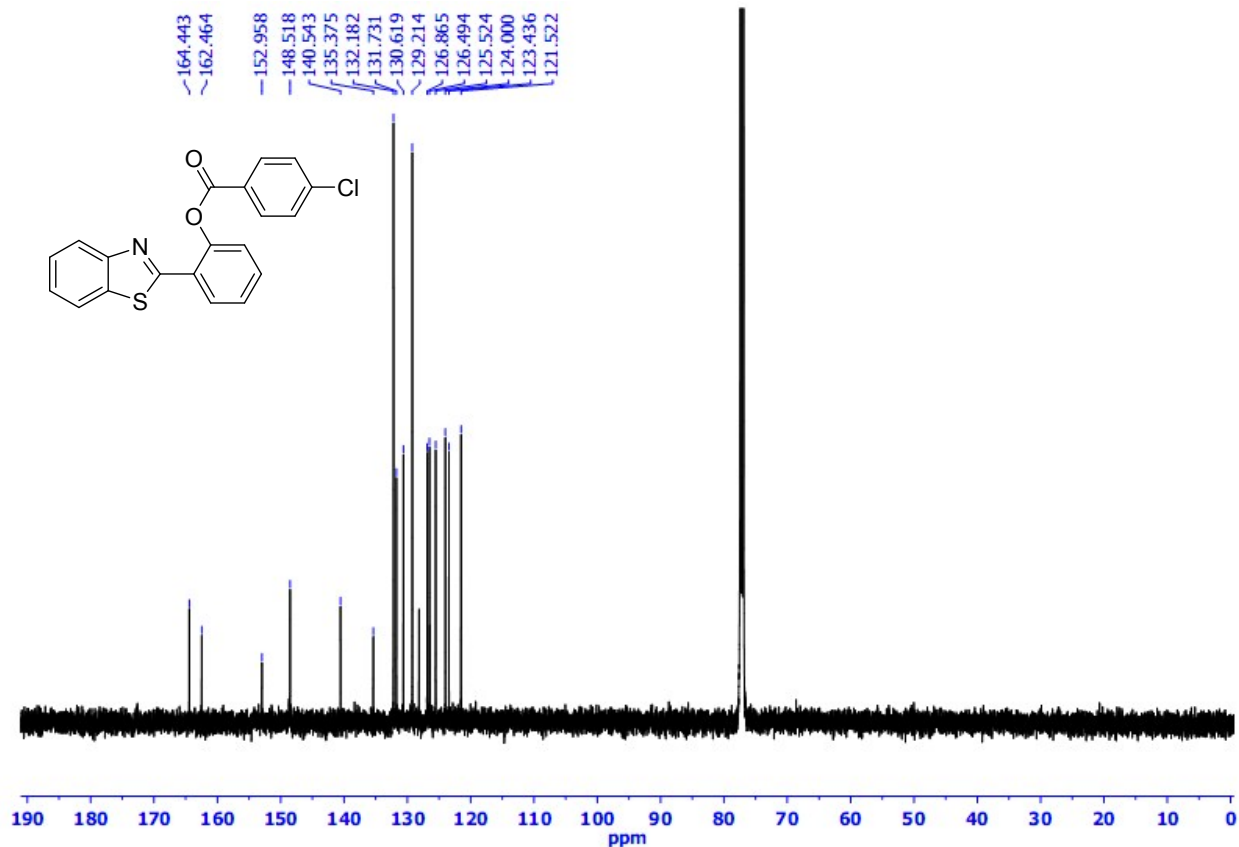

Fig. S42. <sup>13</sup>C-NMR spectra of 2-(benzo[d]thiazol-2-yl)phenyl 4-chlorobenzoate.

### Characterization Data for 2-(benzo[d]thiazol-2-yl)phenyl 4-chlorobenzoate.

Prepared as shown in the general experimental procedure and purified on silica gel (hexane/ethyl acetate = 10:1): white solid, 66% yield. <sup>1</sup>H-NMR (500 MHz, CDCl<sub>3</sub>-*d*) δ 8.38 (d, *J* = 7.9 Hz, 1H, ArH), 8.25 (d, *J* = 8.4 Hz, 2H, ArH), 7.90 (d, *J* = 8.2 Hz, 1H, ArH), 7.83 (d, *J* = 8.0 Hz, 1H), 7.54 – 7.58 (m, 3H, ArH), 7.43 – 7.48 (m, 2H, ArH), 7.33- 7.37 (m, 2H, ArH).; <sup>13</sup>C-NMR (125 MHz, CDCl<sub>3</sub>-*d*) δ 164.4, 162.5, 152.9, 148.5, 140.5, 135.4, 132.2, 131.7, 130.6, 129.2, 126.9, 126.5, 125.5, 124.0, 123.4, 121.5.

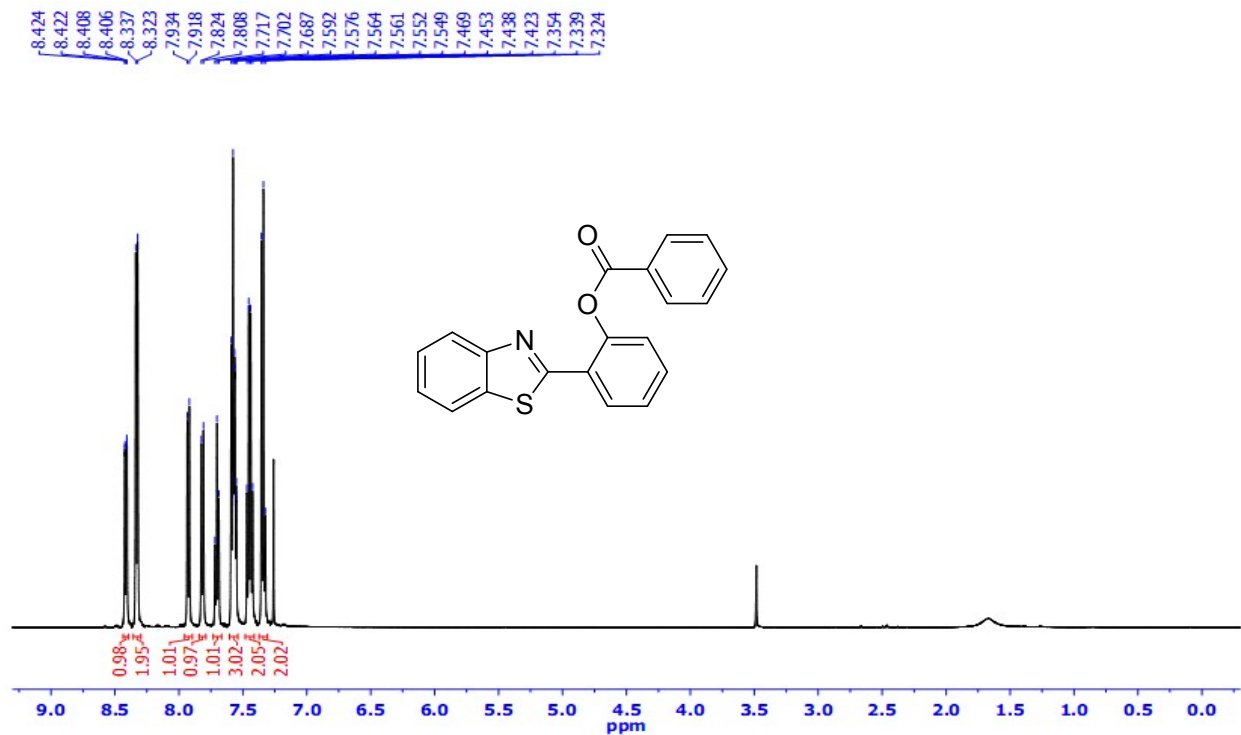

Fig. S43. <sup>1</sup>H-NMR spectra of 2-(benzo[d]thiazol-2-yl)phenyl benzoate.

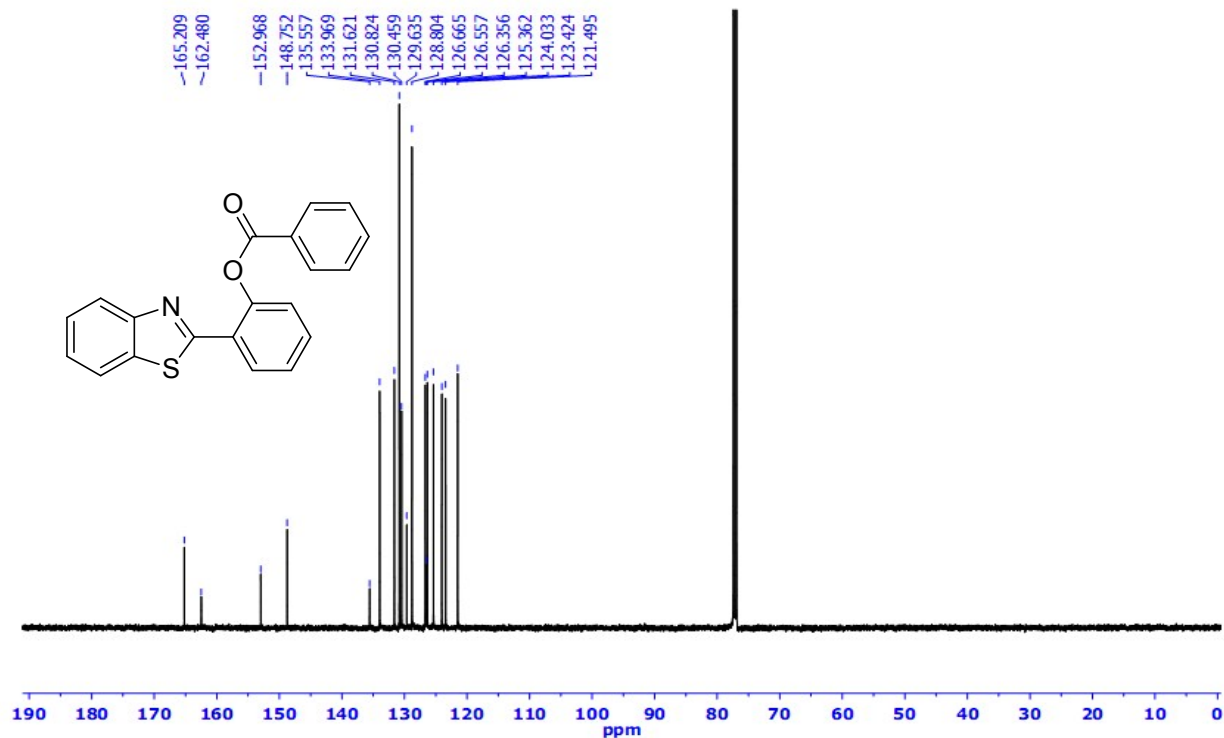

Fig. S44. <sup>13</sup>C-NMR spectra of 2-(benzo[d]thiazol-2-yl)phenyl benzoate.

### Characterization Data for 2-(benzo[d]thiazol-2-yl)phenyl benzoate

Prepared as shown in the general experimental procedure and purified on silica gel (hexane/ethyl acetate = 10:1): yellow solid, 60% yield. <sup>1</sup>H-NMR (500 MHz, CDCl<sub>3</sub>-*d*) δ 8.41 (dd, *J* = 7.9 Hz, *J* = 1.2 Hz, 1H, ArH), 8.33 (d, *J* = 7.4 Hz, 2H, ArH), 7.93 (d, *J* = 8.2 Hz, 1H, ArH), 7.82 (d, *J* = 8.0 Hz, 1H, ArH), 7.69 – 7.71 (m, 1H, ArH), 7.55 – 7.59 (m, 3H, ArH), 7.42 – 7.47 (m, 2H, ArH), 7.32 – 7.35 (m, 2H, ArH); <sup>13</sup>C-NMR (125 MHz, CDCl<sub>3</sub>-*d*) δ 165.2, 162.5, 152.9, 148.8, 135.6, 133.9, 131.6, 130.8, 130.5, 129.3, 128.8, 126.7, 126.6, 126.4, 125.4, 124.0, 123.4, 121.5.

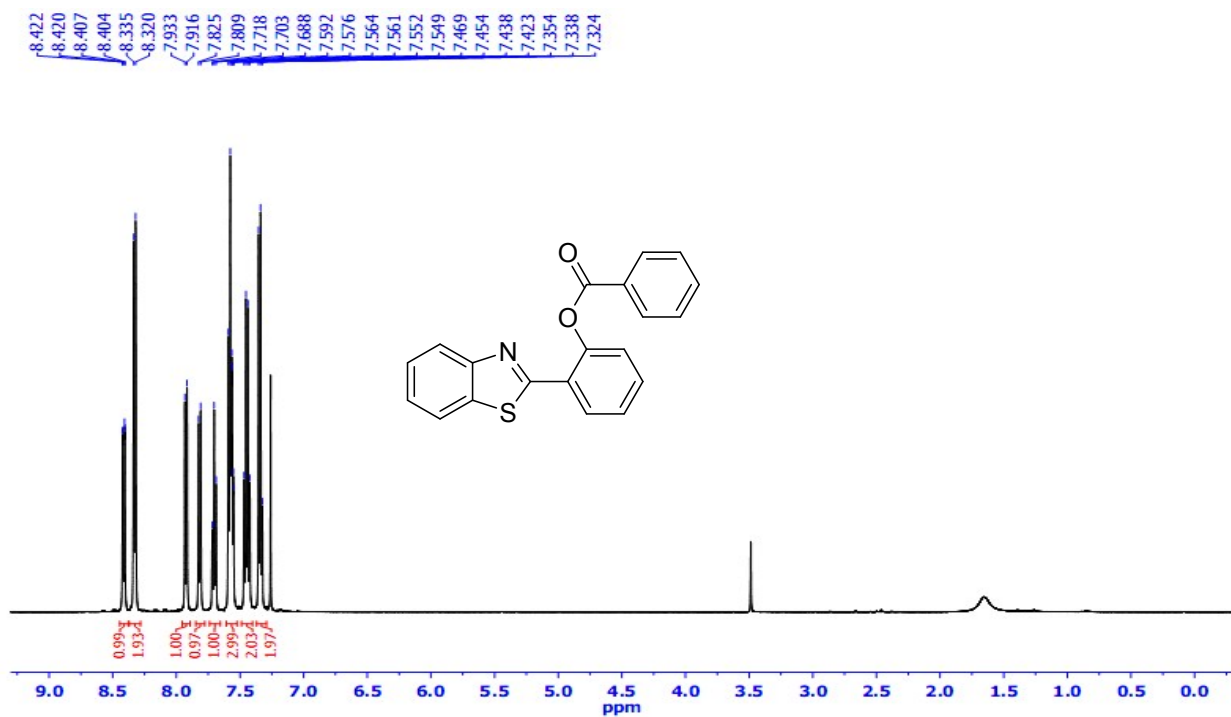

Fig. S45. <sup>1</sup>H-NMR spectra of 2-(benzo[d]thiazol-2-yl)phenyl benzoate.

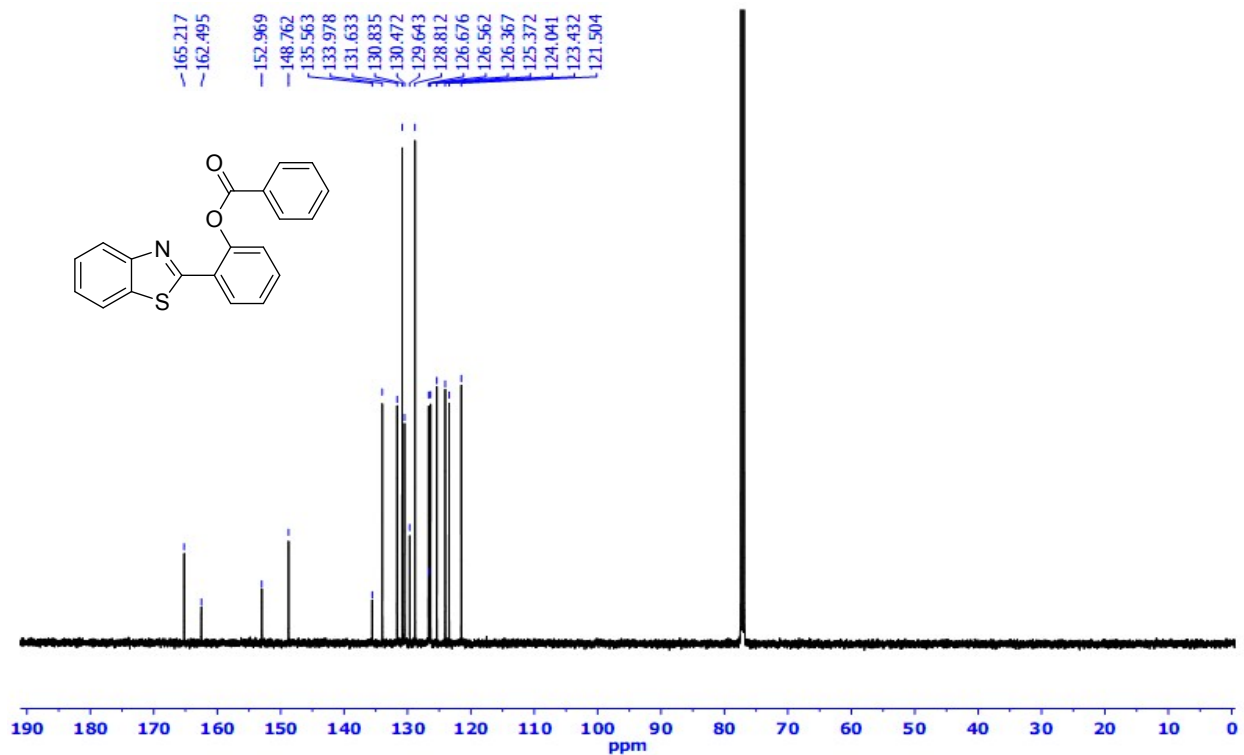

Fig. S46. <sup>13</sup>C-NMR spectra of 2-(benzo[d]thiazol-2-yl)phenyl benzoate.

### Characterization Data for 2-(benzo[d]thiazol-2-yl)phenyl benzoate

Prepared as shown in the general experimental procedure and purified on silica gel (hexane/ethyl acetate = 10:1): yellow solid, 73% yield. <sup>1</sup>H-NMR (500 MHz, CDCl<sub>3</sub>-*d*) δ 8.41 (dd, *J* = 7.9 Hz, *J* = 1.3 Hz, 1H, ArH), 8.33 (d, *J* = 7.4 Hz, 2H, ArH), 7.92 (d, *J* = 8.2 Hz, 1H, ArH), 7.82 (d, *J* = 8.0 Hz, 1H, ArH), 7.69 – 7.72 (m, 1H, ArH), 7.55 – 7.59 (m, 3H, ArH), 7.42 – 7.47 (m, 2H, ArH), 7.32 – 7.35 (m, 2H, ArH); <sup>13</sup>C-NMR (125 MHz, CDCl<sub>3</sub>-*d*) δ 165.2, 162.5, 152.9, 148.8, 135.6, 133.9, 131.6, 130.8, 130.5, 129.6, 128.8, 126.7, 126.6, 126.4, 125.4, 124.0, 123.4, 121.5.



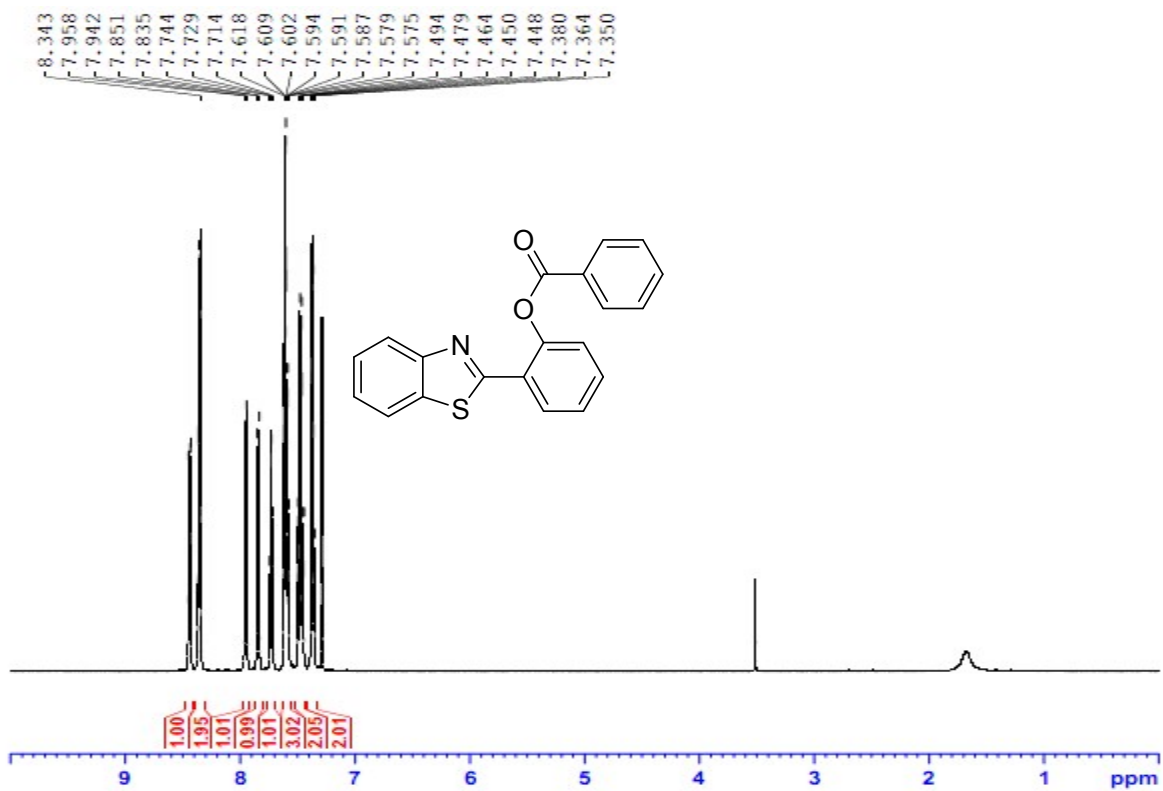

Fig. S47. <sup>1</sup>H-NMR spectra of 2-(benzo[d]thiazol-2-yl)phenyl benzoate.

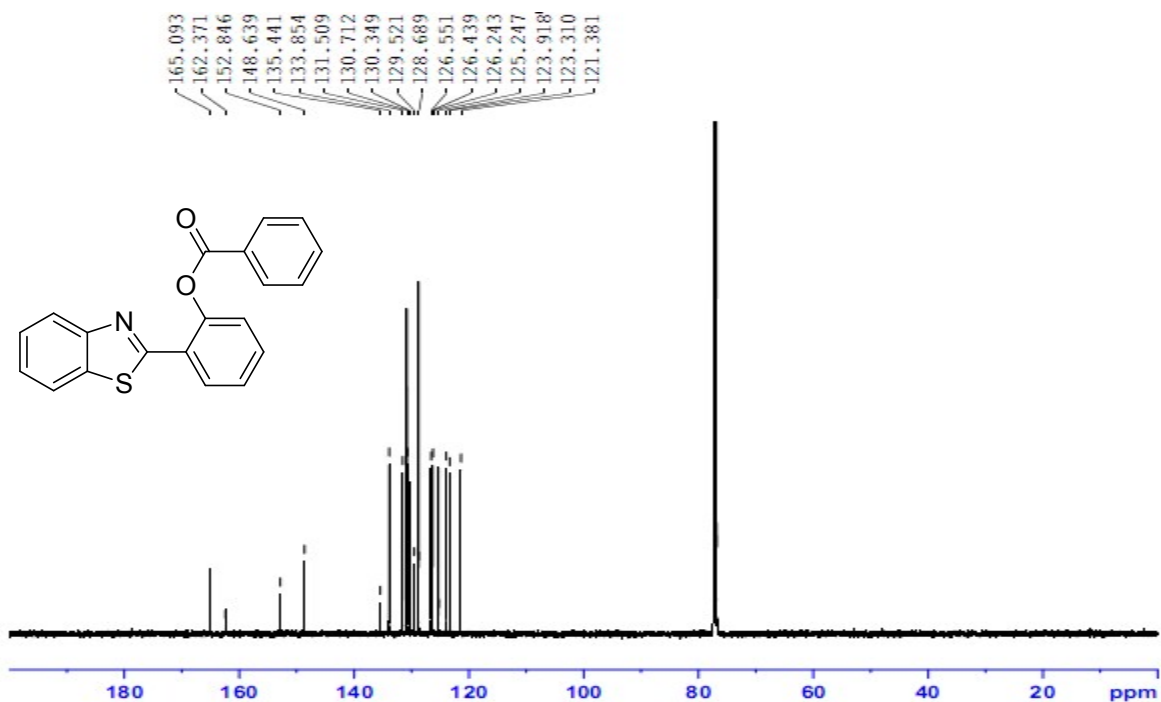

Fig. S48.  $^{13}\text{C}$ -NMR spectra of 2-(benzo[d]thiazol-2-yl)phenyl benzoate.

#### Characterization Data for 2-(benzo[d]thiazol-2-yl)phenyl benzoate.

Prepared as shown in the general experimental procedure and purified on silica gel (hexane/ethyl acetate = 10:1): yellow solid, 75% yield.  $^1\text{H}$ -NMR (500 MHz,  $\text{CDCl}_3$ -*d*)  $\delta$  8.43 (dd,  $J = 8.0$  Hz,  $J = 1.5$  Hz, 1H, ArH), 8.34 – 8.36 (m, 2H, ArH), 7.94 (d,  $J = 8.2$  Hz, 1H, ArH), 7.84 (d,  $J = 8.0$  Hz, 1H, ArH), 7.71 – 7.74 (m, 1H, ArH), 7.57 – 7.62 (m, 3H, ArH), 7.45 – 7.49 (m, 2H, ArH), 7.35 – 7.38 (m, 2H, ArH);  $^{13}\text{C}$ -NMR (125 MHz,  $\text{CDCl}_3$ -*d*)  $\delta$  165.2, 162.5, 152.9, 148.8, 135.6, 133.9, 131.6, 130.8, 130.5, 129.7, 128.8, 126.7, 126.6, 126.4, 125.4, 124.0, 123.4, 121.5.

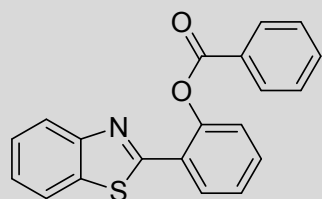

Fig. S49. <sup>1</sup>H-NMR spectra of 2-(benzo[d]thiazol-2-yl)phenyl benzoate.

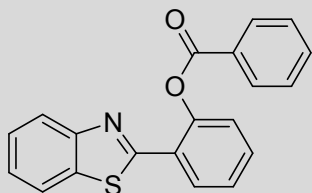

Fig. S50.  $^{13}\text{C}$ -NMR spectra of 2-(benzo[d]thiazol-2-yl)phenyl benzoate.

#### Characterization Data for 2-(benzo[d]thiazol-2-yl)phenyl benzoate

Prepared as shown in the general experimental procedure and purified on silica gel (hexane/ethyl acetate = 10:1): yellow solid, 69% yield.  $^1\text{H}$ -NMR (500 MHz,  $\text{CDCl}_3$ -*d*)  $\delta$  8.41 (dd,  $J = 7.9$  Hz,  $J = 1.2$  Hz, 1H, ArH), 8.33 (d,  $J = 7.4$  Hz, 2H, ArH), 7.93 (d,  $J = 8.2$  Hz, 1H, ArH), 7.82 (d,  $J = 8.0$  Hz, 1H, ArH), 7.69 – 7.71 (m, 1H, ArH), 7.55 – 7.59 (m, 3H, ArH), 7.42 – 7.47 (m, 2H, ArH), 7.32 – 7.35 (m, 2H, ArH);  $^{13}\text{C}$ -NMR (125 MHz,  $\text{CDCl}_3$ -*d*)  $\delta$  165.2, 162.5, 152.9, 148.8, 135.6, 133.9, 131.6, 130.8, 130.5, 129.3, 128.8, 126.7, 126.6, 126.4, 125.4, 124.0, 123.4, 121.5.

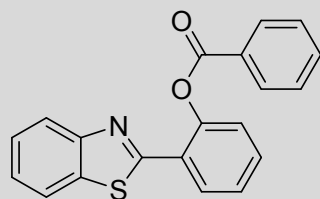

Fig. S51.  $^1\text{H-NMR}$  spectra of 2-(benzo[d]thiazol-2-yl)phenyl benzoate.

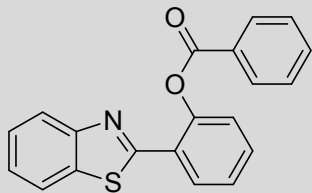

Fig. S52.  $^{13}\text{C}$ -NMR spectra of 2-(benzo[d]thiazol-2-yl)phenyl benzoate.

#### Characterization Data for 2-(benzo[d]thiazol-2-yl)phenyl benzoate

Prepared as shown in the general experimental procedure and purified on silica gel (hexane/ethyl acetate = 10:1): yellow solid, 80% yield.  $^1\text{H}$ -NMR (500 MHz,  $\text{CDCl}_3$ -*d*)  $\delta$  8.41 (dd,  $J = 7.9$  Hz,  $J = 1.2$  Hz, 1H, *ArH*), 8.33 (d,  $J = 7.4$  Hz, 2H, *ArH*), 7.93 (d,  $J = 8.2$  Hz, 1H, *ArH*), 7.82 (d,  $J = 8.0$  Hz, 1H, *ArH*), 7.69 – 7.71 (m, 1H, *ArH*), 7.55 – 7.59 (m, 3H, *ArH*), 7.42 – 7.47 (m, 2H, *ArH*), 7.32 – 7.35 (m, 2H, *ArH*);  $^{13}\text{C}$ -NMR (125 MHz,  $\text{CDCl}_3$ -*d*)  $\delta$  165.2, 162.5, 152.9, 148.8, 135.6, 133.9, 131.6, 130.8, 130.5, 129.3, 128.8, 126.7, 126.6, 126.4, 125.4, 124.0, 123.4, 121.5.

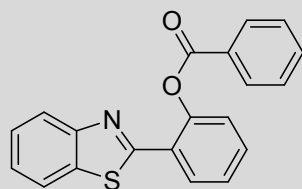

Fig. S53.  $^1\text{H-NMR}$  spectra of 2-(benzo[d]thiazol-2-yl)phenyl benzoate.

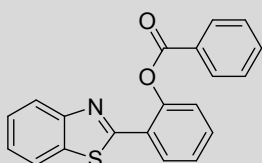

Fig. S54.  $^{13}\text{C}$ -NMR spectra of 2-(benzo[d]thiazol-2-yl)phenyl benzoate.

#### Characterization Data for 2-(benzo[d]thiazol-2-yl)phenyl benzoate

Prepared as shown in the general experimental procedure and purified on silica gel (hexane/ethyl acetate = 10:1): yellow solid, 68% yield.  $^1\text{H}$ -NMR (500 MHz,  $\text{CDCl}_3$ -*d*)  $\delta$  8.41 (dd,  $J = 7.9$  Hz,  $J = 1.3$  Hz, 1H, ArH), 8.33 (d,  $J = 7.4$  Hz, 2H, ArH), 7.92 (d,  $J = 8.2$  Hz, 1H, ArH), 7.82 (d,  $J = 8.0$  Hz, 1H, ArH), 7.69 – 7.72 (m, 1H, ArH), 7.55 – 7.59 (m, 3H, ArH), 7.42 – 7.47 (m, 2H, ArH), 7.32 – 7.35 (m, 2H, ArH);  $^{13}\text{C}$ -NMR (125 MHz,  $\text{CDCl}_3$ -*d*)  $\delta$  165.2, 162.5, 152.9, 148.8, 135.6, 133.9, 131.6, 130.8, 130.5, 129.6, 128.8, 126.7, 126.6, 126.4, 125.4, 124.0, 123.4, 121.5.



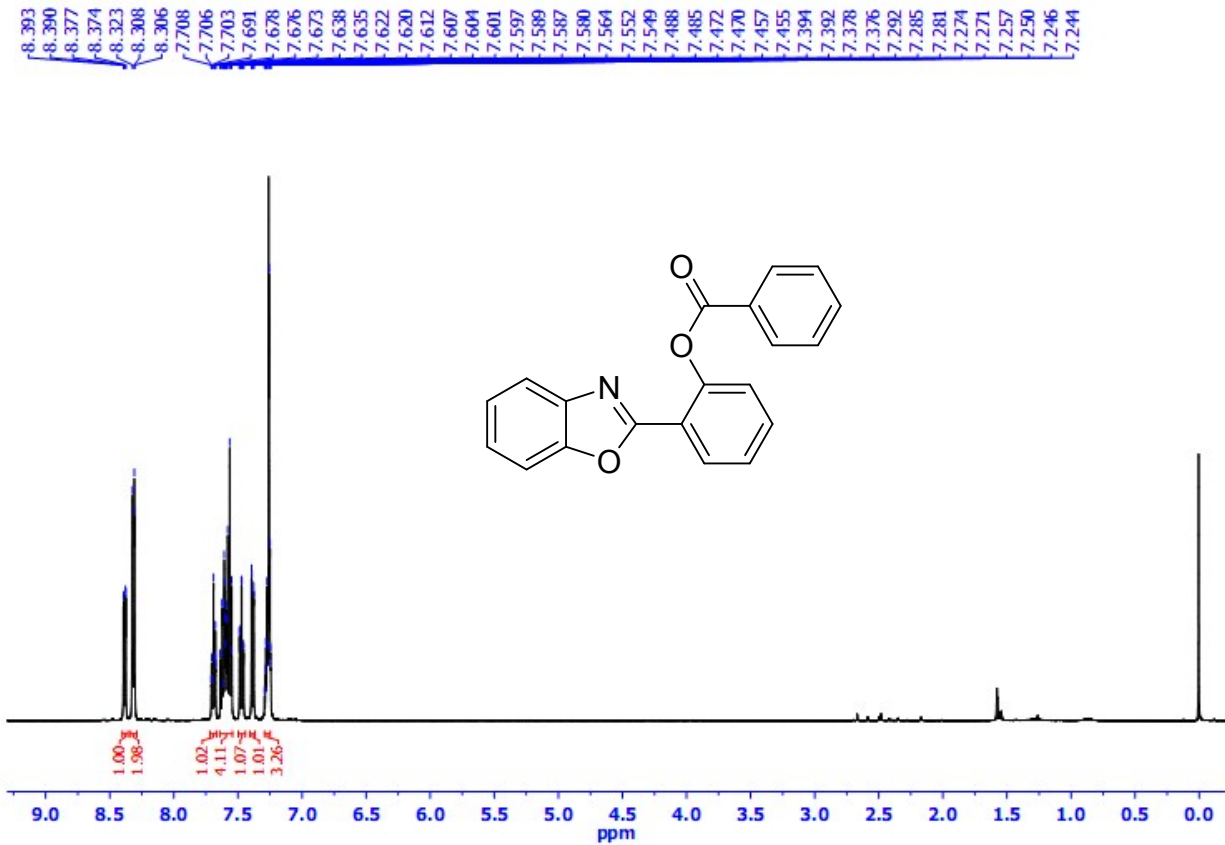

Fig. S55. <sup>1</sup>H-NMR spectra of 2-(benzo[d]oxazol-2-yl)phenyl benzoate.

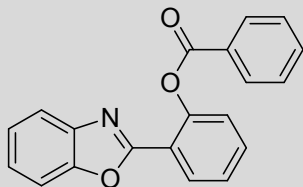

Fig. S56.  $^{13}\text{C}$ -NMR spectra of 2-(benzo[d]oxazol-2-yl)phenyl benzoate.

**Characterization Data for 2-(benzo[d]oxazol-2-yl)phenyl benzoate.**

Prepared as shown in the general experimental procedure and purified on silica gel (hexane/ethyl acetate = 10:1): white solid, 51% yield.  $^1\text{H}$  NMR (500 MHz,  $\text{CDCl}_3$ -*d*)  $\delta$  8.38 (dd,  $J = 7.9, 1.6$  Hz, 1H, ArH), 8.34 – 8.29 (m, 2H, ArH), 7.72 – 7.67 (m, 1H, ArH), 7.64 – 7.54 (m, 4H, ArH), 7.47 (td,  $J = 7.7, 1.1$  Hz, 1H, ArH), 7.39 (dd,  $J = 8.1, 0.9$  Hz, 1H, ArH), 7.29 – 7.25 (m, 3H, ArH);  $^{13}\text{C}$ -NMR (125 MHz,  $\text{CDCl}_3$ -*d*)  $\delta$  165.8, 160.3, 150.5, 149.6, 141.8, 133.6, 132.6, 130.7, 130.6, 130.0, 128.6, 126.7, 125.4, 124.6, 124.5, 120.7, 120.4, 110.5.

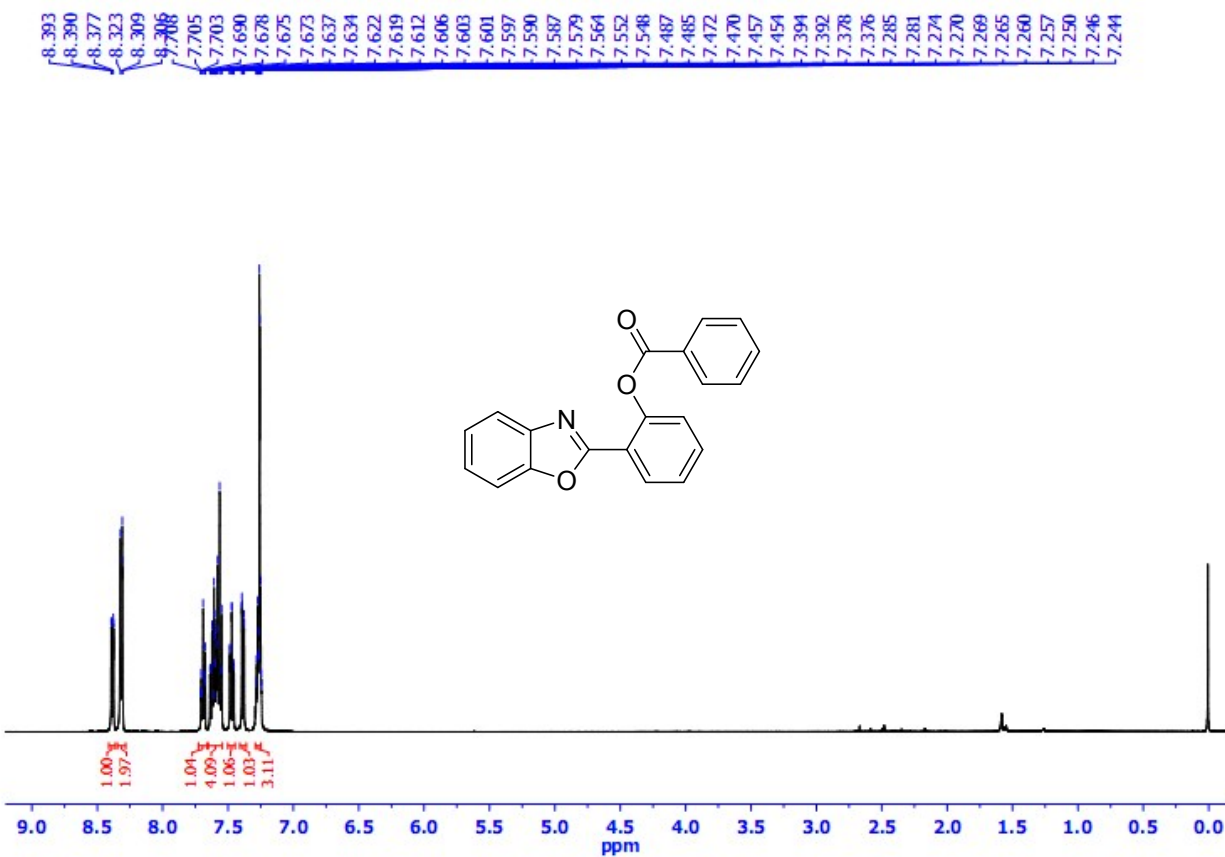

S57. <sup>1</sup>H-NMR spectra of 2-(benzo[d]oxazol-2-yl)phenyl benzoate

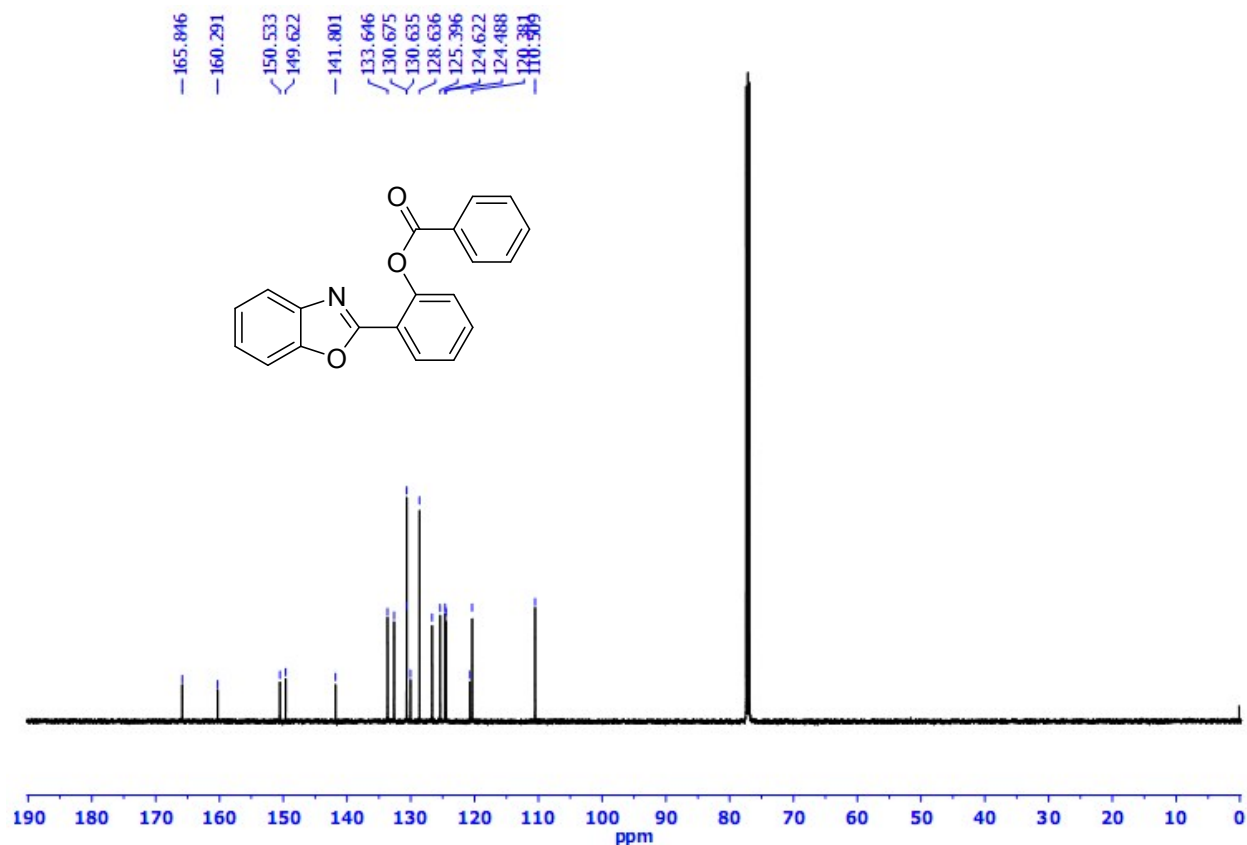

Fig. S58. <sup>13</sup>C-NMR spectra of 2-(benzo[d]oxazol-2-yl)phenyl benzoate.

**Characterization Data for 2-(benzo[d]oxazol-2-yl)phenyl benzoate.**

Prepared as shown in the general experimental procedure and purified on silica gel (hexane/ethyl acetate = 10:1): white solid, 52% yield. <sup>1</sup>H NMR (500 MHz, CDCl<sub>3</sub>-d) 8.38 (dd, *J* = 7.9, 1.6 Hz, 1H, ArH), 8.35 – 8.28 (m, 2H, ArH), 7.73 – 7.66 (m, 1H, ArH), 7.65 – 7.54 (m, 4H, ArH), 7.47 (td, *J* = 7.7, 1.1 Hz, 1H, ArH), 7.39 (dd, *J* = 8.1, 0.9 Hz, 1H, ArH), 7.27 (m, 3H, ArH).; <sup>13</sup>C-NMR (125 MHz, CDCl<sub>3</sub>-d) δ 165.8, 160.3, 150.5, 149.6, 141.8, 133.6, 132.6, 130.7, 130.6, 130.0, 128.6, 126.7, 125.4, 124.6, 124.5, 120.7, 120.4, 110.5.

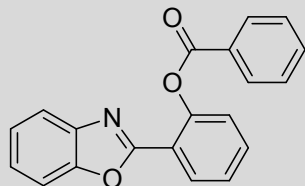

Fig. S59. <sup>1</sup>H-NMR spectra of 2-(benzo[d]oxazol-2-yl)phenyl benzoate.

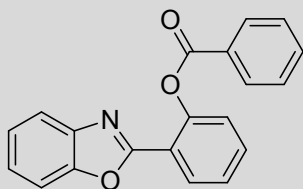

Fig. S60.  $^{13}\text{C}$ -NMR spectra of 2-(benzo[d]oxazol-2-yl)phenyl benzoate.

**Characterization Data for 2-(benzo[d]oxazol-2-yl)phenyl benzoate.**

Prepared as shown in the general experimental procedure and purified on silica gel (hexane/ethyl acetate = 10:1): white solid, 60% yield.  $^1\text{H}$  NMR (500 MHz,  $\text{CDCl}_3-d$ )  $\delta$  8.39 (d,  $J = 7.4$  Hz, 1H, ArH), 8.32 (d,  $J = 7.5$  Hz, 2H, ArH), 7.69 (t,  $J = 7.4$  Hz, 1H, ArH), 7.65 – 7.54 (m, 4H, ArH), 7.47 (t,  $J = 7.5$  Hz, 1H, ArH), 7.39 (d,  $J = 8.0$  Hz, 1H, ArH), 7.28 (s, 3H, ArH);  $^{13}\text{C}$ -NMR (125 MHz,  $\text{CDCl}_3-d$ )  $\delta$  165.8, 160.3, 150.5, 149.6, 141.8, 133.6, 132.6, 130.7, 130.6, 130.0, 128.6, 126.7, 125.4, 124.6, 124.5, 120.7, 120.4, 110.5.
